1 **The E3 SUMO ligase Nse2 regulates sumoylation and nuclear-to-**  
2 **cytoplasmic translocation of skNAC-Smyd1 in myogenesis**

3  
4 Running title: Smyd1 sumoylation in myogenesis

5 Janine Berkholz<sup>1</sup>, Laura Michalick<sup>1</sup>, and Barbara Munz<sup>2,#</sup>

6 <sup>1</sup>Charité – University Medicine Berlin, Institute of Physiology, Charitéplatz 1,

7 D-10117 Berlin, Germany

8 <sup>2</sup>University Hospital Tubingen, Medical Clinic, Department of Sports Medicine,

9 Hoppe-Seyler-Str. 6, D-72076 Tubingen, Germany

10 Phone: +49-7071-29-88377

11 Fax: +49-7071-29-25028

12 e-mail: [barbara.munz@med.uni-tuebingen.de](mailto:barbara.munz@med.uni-tuebingen.de)

13 #to whom correspondence should be addressed

14  
15  
16  
17 Keywords: skNAC, Smyd1/m-Bop, Mms21/Nse2, sumoylation,

18 myogenic differentiation

19

## 1 **Summary**

2 Skeletal and heart muscle-specific variant of the alpha subunit of nascent  
3 polypeptide associated complex (skNAC) is exclusively found in striated muscle cells.  
4 Its function, however, is largely unknown. Previous reports could demonstrate that  
5 skNAC binds to Smyd1/m-Bop, a multi-functional protein regulating myogenesis both  
6 via the control of transcription and the modulation of sarcomerogenesis, and that  
7 both proteins undergo nuclear-to-cytoplasmic translocation at later stages of  
8 myogenic differentiation. Here, we show that skNAC binds to the E3 SUMO ligase  
9 mammalian Mms21/Nse2 and that knockdown of *Nse2* expression inhibits specific  
10 aspects of myogenic differentiation, accompanied by a partial blockade of the  
11 nuclear-to-cytoplasmic translocation of the skNAC/Smyd1 complex, retention of the  
12 complex in PML-like nuclear bodies, and disturbed sarcomerogenesis. In addition, we  
13 show that the skNAC interaction partner Smyd1 contains a putative sumoylation motif  
14 and is sumoylated in muscle cells, with depletion of Mms21/Nse2 leading to reduced  
15 concentrations of sumoylated Smyd1. Taken together, our data suggest that the  
16 function, specifically the balance between nuclear and cytosolic roles of the  
17 skNAC/Smyd1 complex, might be regulated by sumoylation.

18

19

20 Author contribution: B.M. and J.B. designed the study, J.B. and L.M. carried out  
21 experiments, B.M., J.B., and L.M. wrote the paper.

22

## 1 Introduction

2 Skeletal and heart muscle-specific variant of the alpha subunit of nascent  
3 polypeptide associated complex (skNAC) is encoded by a splice variant of the alpha  
4 subunit of nascent polypeptide associated complex, a ubiquitous protein which plays  
5 a role in the targeting of newly synthesized polypeptide chains within the cell  
6 (Wiedmann *et al.*, 1994).

7 In contrast to  $\alpha$ NAC, skNAC is exclusively found in skeletal and heart muscle  
8 cells. Its function, so far, is still enigmatic.

9 In 1996, Yotov and St.-Arnaud could show that skNAC enhances transcription  
10 of the *Myoglobin* gene, suggesting that the protein might act as a transcriptional  
11 (co)activator for this gene and that it might be involved in the regulation of oxidative  
12 versus glycolytic metabolism in muscle fibers, namely, fiber type specification.

13 In addition, we and others could previously show that the *skNAC* gene is not  
14 expressed in proliferating myoblasts, however, expression is induced after the  
15 induction of myogenic differentiation or during muscle regeneration (Yotov and St.-  
16 Arnaud, 1996, Munz *et al.*, 1999). Furthermore, *skNAC*-deficient mice are  
17 characterized by cardiac defects and also by skeletal muscle hypotrophy, aberrant  
18 fiber type specification/metabolism, and regeneration defects (Park *et al.*, 2010),  
19 suggesting that the skNAC protein might be involved in the regulation of skeletal and  
20 heart muscle development, homeostasis, and regeneration.

21 Finally, a function for skNAC in transcriptional regulation is also suggested by  
22 the 2002 paper of Sims *et al.*: The authors showed for the first time that skNAC binds  
23 to the mBop/Smyd1 protein, a SET-domain-containing histone methyltransferase  
24 which also contains a MYND domain known to be involved in the recruitment of  
25 HDACs. Interestingly, the skNAC/Smyd1 complex localizes to the nucleus in early-  
26 differentiating myoblasts and then translocates to the cytosol at later stages of  
27 differentiation, where at least Smyd1 is physically associated with sarcomeric  
28 structures (Just *et al.*, 2011, Li *et al.*, 2011), suggesting that besides regulating  
29 transcription, the proteins might also exert a cytoplasmic function at later stages of  
30 myogenesis.

1 In fact, in 2009, Li and colleagues could demonstrate that zebrafish embryos  
2 in which *skNAC* expression had been knocked down by a morpholino antisense  
3 oligonucleotide-mediated approach were paralyzed and showed no heartbeat. This  
4 was most likely due to defects in myofibrillogenesis and/or sarcomerogenesis:  
5 Embryos in which *skNAC* expression had been knocked down showed irregular  
6 distribution of actin and myosin filaments, and no formation of well-structured  
7 sarcomeres. Correspondingly, we could recently demonstrate defective  
8 sarcomerogenesis in murine C2C12 myoblasts after *skNAC* depletion using an  
9 siRNA-mediated approach (Berger *et al.*, 2012, Berkholz *et al.*, 2013). These data  
10 implicate *skNAC* in the regulation of sarcomere formation.

11 In addition, an essential role in the regulation of sarcomere assembly has  
12 recently also been demonstrated for the *skNAC* binding partner Smyd1 (Tan *et al.*,  
13 2006, Just *et al.*, 2011, Li *et al.*, 2011, Li *et al.*, 2013), indicating that the two proteins  
14 operate together in the control of myofibrillogenesis and sarcomerogenesis.

15 Thus, given potential functions of the *skNAC*/Smyd1 complex in both the  
16 nuclear and the cytoplasmic compartments, we wondered how the translocation of  
17 the two proteins to the cytoplasm in later myogenesis might be regulated. One  
18 possibility is sumoylation.

19 Sumoylation is a process in which the small proteins SUMO-1, -2, and -3  
20 become covalently attached to their target proteins by the sequential action of three  
21 enzymes or enzyme families, the E1, the E2, and the E3 SUMO ligases. In contrast  
22 to the mechanistically similar process of protein ubiquitination, however, sumoylation  
23 does not target the respective proteins for proteasomal decay, but plays an important  
24 role in the regulation of various cellular functions, such as the modulation of gene  
25 expression or the regulation of nucleocytoplasmatic shuttling (for review, see Garcia-  
26 Dominguez *et al.*, 2009, Hannoun *et al.*, 2010).

27 Little is known about possible functions of protein sumoylation in skeletal  
28 muscle cells. However, Riquelme *et al.* (2006b) could demonstrate that blocking  
29 expression of the *Ubc9* gene, which encodes the only E2 SUMO ligase known to  
30 date, strongly inhibits the terminal differentiation of C2C12 myoblasts. These data  
31 suggested for the first time that sumoylation might play an important regulatory role in  
32 myogenesis.

1           Indeed, specific sumoylation targets in mammalian skeletal muscle cells have  
2 been identified, such as the GLUT1 and GLUT4 glucose transporters (Giorgino *et al.*,  
3 2000), suggesting a role in insulin resistance (Kampmann *et al.*, 2011), the myocyte  
4 enhancer factor-2 (MEF2) family of transcription factors (Grégoire and Yang, 2005,  
5 Kang *et al.*, 2006, Riquelme *et al.*, 2006a), the myogenesis-inducing protein SnoN  
6 (Hsu *et al.*, 2006, Wrighton *et al.*, 2007), the PPAR $\gamma$  nuclear receptor (Chung *et al.*,  
7 2011a), or – most recently – the myogenic determination factor PAX7 (Luan *et al.*,  
8 2012), and the basic helix-loop-helix transcription factor Sharp-1 (Wang *et al.*, 2013).  
9 In addition, it has been known for quite a while that sumoylation increases the  
10 stability of histone deacetylases (HDACs) (for review, see Garcia-Dominquez *et al.*,  
11 2009), which might result in the repression of the genes encoding the MEF2 class of  
12 myogenic transcription factors (for review, see Potthoff and Olson, 2007, Glass,  
13 2007). Finally, specific interaction with certain E3 SUMO ligases, without subsequent  
14 sumoylation, appears to regulate binding affinity for particular targets, such as in the  
15 case of the homeobox transcription factor Msx1, which needs binding to the E3  
16 SUMO ligase PIAS1 in order to suppress the expression of myogenic regulatory  
17 genes such as MyoD (Lee *et al.*, 2006).

18           Here, we demonstrate that skNAC binds to the E3 SUMO ligase Nse2 and that  
19 inhibition of *Nse2* expression represses specific aspects of skeletal muscle  
20 differentiation, such as expression of the *MyHC* myogenic marker and the formation  
21 of well-structured sarcomeres, and reduces nucleocytoplasmic translocation of the  
22 skNAC/Smyd1 complex. In addition, we show that the skNAC binding partner  
23 Smyd1/mBop can get sumoylated in skeletal muscle cells and might thus represent a  
24 potential Nse2 target. Taken together, our data suggest that sumoylation plays an  
25 important role in balancing the nuclear and the cytosolic functions of the  
26 skNAC/Smyd1 complex.

27

## 1 Results

2 **skNAC binds to the SUMO ligase mammalian Mms21/Nse2.** When  
3 searching for novel skNAC binding partners, we inadvertently observed that in  
4 C2C12 murine myoblasts, this protein binds to the E3 SUMO ligase  
5 Nse2/mammalian homolog of yeast Mms21. The interaction was confirmed via co-  
6 immunoprecipitation of recombinant, FLAG-tagged skNAC truncation mutants and  
7 endogenous Nse2 protein. Particularly, we found that a fragment located at the  
8 carboxyterminal end of the skNAC-specific middle domain (aa 1712-1995)  
9 specifically bound to the endogenous Nse2 protein. By contrast, an skNAC fragment  
10 located more aminoterminally only weakly bound to Nse2 when overexpressed at  
11 very high levels (data not shown). Two unrelated, FLAG-tagged proteins (pFLAG-  
12 CMV-NADK and pFLAG-CMV-LRP6<sub>cytoplasmic domain</sub>) did not bind to Nse2 (Fig.1). *Nse2*  
13 was broadly expressed in mammalian tissues and organs, with particularly high  
14 expression levels in skeletal and heart muscle, liver, skin, and brain (data not shown).

15 **Expression of the *Nse2* gene declines during myogenic differentiation.**  
16 To analyze the expression kinetics of the *Nse2* gene in myogenesis, C2C12 cells  
17 were differentiated *in vitro* and *Nse2* expression was determined via Northern blot  
18 (Fig.2A), semi-quantitative RT-PCR analysis (Fig.2B), and Western blot (Fig.2C). In  
19 addition, we studied the question whether depletion of skNAC or its other known  
20 binding partner Smyd1 has a detectable effect on *Nse2* expression. Overall, we  
21 found that *Nse2* expression was first slightly induced, peaking at t=48h after the  
22 induction of differentiation, and then gradually declined both at the mRNA and at the  
23 protein level. Inhibition of *skNAC* and *Smyd1* expression using specific siRNAs had  
24 no effect on *Nse2* expression levels at all time points analyzed (24-120 h after the  
25 induction of differentiation), when compared to the respective controls.

26 ***Nse2* translocates to the cytoplasm during skeletal muscle cell**  
27 **differentiation.** When analyzing the intracellular localization of the Nse2 protein in  
28 skeletal muscle cells using immunofluorescence analysis, we observed staining of  
29 both the nuclear and the cytoplasmic region in proliferating and early-differentiating  
30 myoblasts and myotubes. Interestingly, in most cells, the nuclear staining was  
31 characterized by small dots and staining of the perinuclear region was particularly  
32 strong. Soon after the induction of myogenic differentiation, however, overall nuclear

1 staining became weaker. In differentiated myotubes, finally, nuclear staining was  
2 almost absent. By contrast, strong cytoplasmic staining could be detected, indicating  
3 a nuclear-to-cytosolic translocation of the Nse2 protein in myogenesis, reminiscent of  
4 the skNAC/Smyd1 intracellular translocation in myogenic differentiation (Fig.2D). To  
5 prove the nuclear-to-cytosolic translocation of the Nse2 protein, C2C12 cells were  
6 again induced to differentiate and nuclear proteins were separated from the cytosolic  
7 fraction. As shown in Fig.2E, using Western blot analysis, we could indeed  
8 demonstrate a strong decline of nuclear Nse2 protein within the first five days after  
9 the induction of differentiation.

10 **Inhibition of Nse2 expression influences expression of genes encoding**  
11 **myogenic differentiation markers, and of skNAC target genes.** To functionally  
12 study a potential role of the Nse2 protein in myogenesis, we blocked expression of  
13 the respective gene in C2C12 cells using specific siRNAs. As shown in Fig.3A, using  
14 this approach, we could inhibit Nse2 expression in these cells at the RNA and at the  
15 protein level by about 60%. To exclude off-target effects, two different Nse2 siRNA  
16 species were employed and all major results were reproduced with both species.  
17 Morphologically, cells in which Nse2 expression had been knocked down appeared  
18 normal throughout the differentiation process (Fig.3B). Nevertheless, expression of  
19 certain myogenic differentiation markers, such as *MyoD* or *MyHC*, as well as *Smyd1*,  
20 was reduced at the mRNA level, whereas expression of others was unchanged or  
21 induced (Fig.3C). Since we could recently demonstrate a role for skNAC in the  
22 control of sarcomerogenesis in mammalian cells (Berger *et al.*, 2012, Berkholz *et al.*,  
23 2013), we hypothesized that, given an interaction between skNAC and Nse2, the  
24 latter might also be involved in the regulation of sarcomerogenesis. Indeed, when we  
25 analyzed the intracellular staining pattern of  $\alpha$ -sarcomeric actin and MyHC, the two  
26 major sarcomere proteins, in our siRNA-transfected cells, we could detect a diffuse  
27 and weak cytoplasmic staining, accompanied by strong staining immediately beneath  
28 the plasma membrane. This staining pattern was clearly different from that observed  
29 in untransfected or scr-siRNA-transfected controls, in which the typical,  
30 homogeneously distributed spotty staining of newly forming sarcomeres could be  
31 detected (Fig.3D), and was reminiscent of the MyHC and  $\alpha$ -sarcomeric actin staining  
32 patterns we previously observed in myoblasts in which *skNAC* expression had been  
33 knocked down (Berger *et al.*, 2012, Berkholz *et al.*, 2013). The perturbed

1 sarcomerogenesis we had previously seen in skNAC siRNA-transfected cells was  
2 dependent on an induction of *calpain* gene expression and calpain enzymatic activity  
3 (Berger *et al.*, 2012). Calpains are a family of calcium-dependent proteases with a  
4 proven role in the regulation of skeletal and heart muscle homeostasis (Sorimachi  
5 and Ono, 2012). Thus, we hypothesized that induction of *calpain* expression might  
6 also be responsible for the inhibition of proper sarcomere formation in our Nse2  
7 siRNA-transfected cells. Indeed, in these cells, we found a profound upregulation of  
8 *calpain 1* gene expression (Fig.3E), similarly as previously demonstrated in the  
9 skNAC siRNA-transfected cells, indicating that inhibition of sarcomerogenesis might  
10 actually be caused by enhanced calpain proteolytic activity in these cells. To  
11 functionally prove this hypothesis, cells that had been transfected with the Nse2  
12 siRNA were treated with the calpain inhibitor ALLN (N-[N-(N-Acetyl-L-leucyl)-L-  
13 leucyl]-L-norleucine). As shown in Fig.3F, this treatment indeed rescued the  
14 phenotype of defective sarcomerogenesis: The respective  $\alpha$  sarcomeric actin  
15 staining resembled that seen in untransfected controls.

16 **Inhibition of global protein sumoylation in myoblasts blocks**  
17 **morphological signs of myogenic differentiation.** Next, we wondered whether a  
18 complete blockade of protein sumoylation to some extent mimicks the effects seen  
19 after Nse2 depletion. In fact, when we blocked global protein sumoylation by treating  
20 the cells with ginkgolic acid or by transfecting them with siRNA directed against the  
21 general E2 SUMO ligase Ubc9 (Fig.4A), we found that the appearance of  
22 morphological signs of myogenic differentiation, such as the formation of spindle cell-  
23 shaped myocytes and multinucleate myotubes, was reduced and delayed (Fig.4B).  
24 Consistently, expression of specific myogenic differentiation markers was repressed  
25 (Fig.4C), an effect that has also previously been described by Riquelme *et al.*, 2006b,  
26 for cells in which Ubc9 had been knocked down. Interestingly, similarly as in cells that  
27 had been transfected with an skNAC-specific siRNA (Berkholz *et al.*, 2013), *calpain*  
28 gene expression was strongly induced in the ginkgolic acid-treated or Ubc9-siRNA-  
29 transfected cells (Fig.4D). Consistently, sarcomerogenesis was disturbed similarly as  
30 in the skNAC- and the Nse2-depleted cells (Fig.4E), indicating that blocking  
31 sumoylation influences the expression of skNAC target genes. Taken together, these  
32 data suggest that sumoylation indeed plays a central role in the regulation of  
33 myogenesis.



1           **Inhibition of *Nse2* expression or global protein sumoylation blocks the**  
2 **nuclear-to-cytoplasmic translocation of the skNAC/Smyd1 complex in**  
3 **myogenic differentiation.** To test our initial hypothesis that nuclear-to-cytoplasmic  
4 translocation of the skNAC/Smyd1 complex might be regulated by *Nse2*, C2C12 cells  
5 that had been transfected with the *Nse2*-specific siRNA were analyzed for subcellular  
6 localization of the skNAC and the Smyd1 proteins by immunofluorescence staining  
7 and by cell fractionation/Western blot. Using this approach, we could detect partial  
8 inhibition of the nuclear-to-cytosolic translocation, which is normally seen for both  
9 proteins at later stages of myogenesis (Fig.5, A-C). In addition, nuclear skNAC was  
10 concentrated in small speckles, whereas cytosolic skNAC was more evenly  
11 distributed (Fig.5A). Consistently, when we inhibited global protein sumoylation by  
12 treating the cells with ginkgolic acid or transfecting them with Ubc9 siRNA, we  
13 observed a similar effect: Cytoplasmic translocation of skNAC was partially inhibited,  
14 accompanied by a spotty skNAC staining in the nucleus (Fig.5D,E). Transfection with  
15 the Ubc9 siRNA also inhibited the nuclear-to-cytosolic translocation of the Smyd1  
16 protein (Fig.5D). These data suggest that *Nse2*-dependent sumoylation is important  
17 for the nuclear-to-cytosolic translocation of the skNAC/Smyd1 complex.

18           ***Nse2* and skNAC colocalize with PML nuclear bodies.** The spotty nuclear  
19 staining of *Nse2*, skNAC, and Smyd1 is reminiscent of the pattern seen when  
20 staining for PML nuclear bodies. Thus, we tested whether *Nse2* and skNAC  
21 colocalize with the PML protein using double immunofluorescence staining, which  
22 was indeed the case (Fig.6A,B). In addition, when transfecting a vector encoding a  
23 GFP-SUMO-1 fusion protein, we could also co-localize skNAC with SUMO-1 protein.

24           **mBop/Smyd1 contains a putative sumoylation motif and is sumoylated in**  
25 **muscle cells.** Given the known SUMO ligase activity of *Nse2* as well as its binding to  
26 the skNAC-Smyd1 complex, we aimed at identifying a potential specific *Nse2*  
27 sumoylation target within this system. Whereas skNAC itself does not contain a  
28 classical sumoylation site, a sumoylation consensus motif (LKDD) can be found in  
29 the Smyd1 sequence and is well-conserved in mammals (Fig.7A), indicating that this  
30 protein might be a potential sumoylation target. And indeed, we could pull out  
31 sumoylated Smyd1 from C2C12 lysates using affinity chromatography with an  
32 immobilized anti-SUMO-1 antibody (Fig.7B). To prove the hypothesis that Smyd1 is  
33 sumoylated in skeletal muscle cells, we immunoprecipitated the protein from C2C12

1 lysates and analyzed protein sumoylation by Western blot. Interestingly, when we co-  
2 transfected SUMO-1 and Smyd1, we observed a strong signal for sumoylated  
3 Smyd1, which was almost completely repressed when we co-transfected an  
4 expression plasmid for the SUMO protease SuPr1 in addition. Furthermore, when we  
5 blocked *Nse2* expression by around 60% in the *SUMO-1/Smyd1*-overexpressing  
6 cells using specific siRNAs, concentrations of sumoylated Smyd1 were much lower  
7 than in cells without *Nse2* depletion 48h after the induction of differentiation (Fig.7C).  
8 Taken together, these data suggest that Smyd1 is sumoylated and that this  
9 sumoylation is dependent on the presence of *Nse2*, indicating that Smyd1 might  
10 indeed be an *Nse2* target.

11

## 1 Discussion

2 skNAC and its known binding partner Smyd1 have been demonstrated to  
3 regulate myogenesis, specifically skeletal myoblast migration and sarcomerogenesis  
4 (Tan *et al.*, 2006, Li *et al.*, 2009, Li *et al.*, 2011, Just *et al.*, 2011, Berger *et al.*, 2012,  
5 Berkholz *et al.*, 2013, Li *et al.*, 2013). Since both proteins undergo nuclear-to-  
6 cytoplasmic translocation during myogenesis (Sims *et al.*, 2002), it is likely that they  
7 fulfill specific functions in both cellular compartments: In early myogenesis, they  
8 might act as transcriptional modulators, presumably via two specific domains within  
9 the Smyd1 protein – the so-called SET domain, a histone methyltransferase moiety,  
10 and the MYND domain, a potential recruiter of histone deacetylases (HDACs). Later  
11 in myogenesis, the skNAC-Smyd1 complex might have specific functions in the  
12 cytoplasm, namely the control of sarcomerogenesis.

13 Our finding that skNAC binds to the E3 SUMO ligase Nse2 indicates that  
14 sumoylation might directly or indirectly be involved in the regulation of the biological  
15 activities of skNAC and/or Smyd1, or that skNAC modulates Nse2 functions.  
16 Specifically, it is possible that skNAC's transcriptional coactivator and/or its  
17 sarcomere-organizing function might be regulated by sumoylation or that skNAC  
18 binding to Nse2 might stimulate or repress Nse2 sumoylation activity or its binding to  
19 other factors. Alternatively, since sumoylation plays an important role in the  
20 regulation of nucleocytoplasmic shuttling (for review, see Zhao, 2007), and since the  
21 skNAC-Smyd1 complex is known to translocate from the nucleus to the cytoplasm at  
22 later stages of myogenic differentiation (Sims *et al.*, 2002), it is possible that Nse2  
23 might be involved in the regulation of this process.

24 The fact that a considerable amount of Nse2 protein localizes to the nucleus  
25 (and also to the perinuclear region) in proliferating and early-differentiating myoblasts  
26 and translocates to the cytosol at later stages is intriguing, since this pattern is  
27 reminiscent of the nuclear-to-cytoplasmic translocation described by Sims *et al.*,  
28 2002, for the skNAC/Smyd1 complex, suggesting that these three proteins might  
29 indeed operate as a complex. Upon inhibition of *Nse2* expression in myoblasts,  
30 we found reduced and delayed expression of myogenic differentiation markers, such  
31 as *MyoD* or *Myosin heavy chain*, despite the fact that myotube formation proceeded  
32 more or less normally. Interestingly, expression of the *Smyd1* gene was also

1 reduced, indicating that regulation of this gene was directly or indirectly dependent on  
2 Nse2. Since both skNAC and Smyd1 have been implicated in the control of  
3 sarcomerogenesis, we also analyzed the staining patterns of  $\alpha$  sarcomeric actin and  
4 myosin heavy chain in the Nse2 siRNA-transfected cells. We observed a staining  
5 pattern reminiscent of that seen in skNAC or Smyd1 siRNA-transfected cells: Weak  
6 and diffuse staining of the myotube center, accompanied by a stronger staining of the  
7 region immediately beneath the plasma membrane, whereas in control cells, the  
8 typical punctuate actin and myosin staining, characteristic for newly forming  
9 sarcomeres, was observed. These data indicate that Nse2 is important for sarcomere  
10 formation, or, in other words, that sarcomerogenesis cannot proceed normally in the  
11 absence of Nse2. Similarly as in skNAC and Smyd1-depleted myoblasts (Berkholz *et*  
12 *al.*, 2013), this appears to be at least in part the result of elevated calpain activities in  
13 these cells, since we could also detect enhanced *calpain 1* expression in the Nse2  
14 siRNA-transfected cells. These data suggest that skNAC, Smyd1, and Nse2 operate  
15 together within a specific pathway to control myogenesis and, particularly,  
16 sarcomerogenesis. So far, however, it is unknown if this is only achieved via the  
17 control of *calpain* gene expression, i.e. via skNAC/Smyd1/Nse2 functions in the  
18 nucleus, or if cytosolic skNAC/Smyd1/Nse2 at later stages of differentiation also  
19 possess a specific role in the control of sarcomerogenesis.

20 Our finding that inhibition of *Nse2* expression and also repression of total  
21 cellular sumoylation blocks the nuclear-to-cytosolic translocation of the skNAC-  
22 Smyd1 complex suggests that sumoylation might control the balance between  
23 nuclear and cytosolic functions of this protein complex.

24 Since total skNAC levels remained unchanged after both Nse2 siRNA  
25 transfection (Fig.3C), or Ubc9 siRNA transfection / ginkgolic acid treatment (Fig.4C),  
26 it is unlikely that the different skNAC staining patterns are the result of different  
27 expression levels of the *skNAC* gene. For Smyd1, we cannot totally exclude this,  
28 since Smyd1 expression was repressed by around 50% under all three conditions.

29 Interestingly, the nuclear staining pattern of Nse2 in early myogenesis showed  
30 a speckled pattern, with strong staining of the perinuclear region in some cells. This  
31 pattern resembles that seen for PML nuclear bodies: These are nuclear matrix-  
32 associated domains that recruit a variety of different proteins, are organizers of key

1 nuclear functions such as replication, transcription, DNA repair, and epigenetic  
2 silencing, and, most remarkably, are centers of protein sumoylation (for review, see  
3 Lallemand-Breitenbach and de Thé, 2010). Indeed, we could colocalize Nse2 and  
4 skNAC with PMLs. Since the yeast Nse2 homologue, Mms21, as well as mammalian  
5 Nse2 have been implicated in DNA repair, recombination, and chromosome cohesion  
6 and telomere integrity (for review, see Potts, 2009, Stephan *et al.*, 2011), and since  
7 Mms21/Nse2 is a key component of PMLs (Potts and Yu, 2007, Brouwer *et al.*, 2009,  
8 Chung *et al.*, 2011b), it seems likely that Nse2, skNAC, and Smyd1 function as a  
9 PML-associated complex in early myogenesis.

10 Most remarkably, skNAC and Smyd1, which – upon Nse2 depletion or  
11 inhibition of sumoylation - were retained in the nucleus even at later stages of  
12 myogenesis, and persisted in PML body-like structures, suggesting that their release  
13 from these structures was somehow inhibited by the absence of Nse2 or a global  
14 blockade of sumoylation. Interestingly, we could demonstrate that at earlier stages of  
15 myogenesis, skNAC, Smyd1, and Nse2 indeed colocalize with SUMO-1 within these  
16 speckles. Thus, in the future, it will be crucial to determine the mechanism by which  
17 sumoylation might be involved in the regulation of the nuclear-to-cytosolic  
18 translocation of the skNAC / Smyd1 complex and thereby in the control of its potential  
19 subcellular-compartment-specific. Interestingly, a specific role for Mms21, the yeast  
20 Nse2 homolog, in the regulation of nucleocytoplasmic shuttling via the import  
21 receptor Kap114, has recently been demonstrated (Rothenbusch *et al.*, 2012,  
22 Werner and Melchior, 2012).

23 A search for putative sumoylation sites in both the skNAC and the Smyd1  
24 sequences revealed the presence of such a site within the Smyd1, but not within the  
25 skNAC sequence and prompted us to test whether Smyd1 might be sumoylated. We  
26 found that Smyd1 is indeed sumoylated in skeletal muscle cells, an effect that was  
27 dependent on the presence of Nse2. Thus, in the future, it will be interesting to  
28 eliminate this sumoylation motif using site-directed mutagenesis and thereby analyze  
29 the specific functions of Smyd1 sumoylation in myogenesis in more detail.

30 Finally, most recently and remarkably, Simpson-Lavy and Johnston, 2013,  
31 could demonstrate that the yeast Nse2 homolog, Mms21, can sumoylate the SNF1  
32 protein, which is the yeast homolog of the mammalian AMP-activated protein kinase

1 (AMPK), thereby inhibiting its catalytic activity. Since in mammalian skeletal muscle  
2 cells, AMPK is a central player in the regulation of cell metabolism and fiber type  
3 specification, and since skNAC has been implicated in the control of fiber type  
4 specification (Yotov and St.-Arnaud, 1996, Park *et al.*, 2010, J. Berkholz and B.  
5 Munz, unpublished data), this finding suggests an interesting link between  
6 Nse2/Mms21 and skeletal muscle plasticity.

7       Taken together, we provide evidence for the existence of an skNAC-Smyd1-  
8 Nse2 complex, in which Smyd1 is sumoylated in an Nse2-dependent manner. We  
9 show data suggesting that this sumoylation is important for the nuclear-to-cytosolic  
10 translocation of the skNAC/Smyd1 complex at later stages of myogenesis and might  
11 thus be crucial with respect to balancing the functions of this protein complex in both  
12 cellular compartments (Fig.8).

13

## 1 **Materials and Methods**

2 **Tissue culture.** Murine C2C12 cells were cultured in Dulbecco's modified  
3 Eagle's medium containing 20% fetal bovine serum (growth medium) at 37°C and 5%  
4 CO<sub>2</sub>. To induce differentiation, cells were grown to 80 to 90% confluence and then  
5 switched to differentiation medium (Dulbecco's modified Eagle's medium containing  
6 2% horse serum).

7 **Treatment of cells with ginkgolic acid.** Ginkgolic Acid (50 μM) was added to  
8 cells in parallel to switching them to differentiation medium. The optimal ginkgolic  
9 acid concentration was determined in a series of dose-response analyses prior to the  
10 actual experiments.

11 **ALLN treatment of cells.** The calpain inhibitor ALLN (N-[N-(N-Acetyl-L-  
12 leucyl)-L-leucyl]-L-norleucine) (50 μM), was added 48h after the induction of  
13 differentiation and cells were then fixed for immunofluorescence analysis after a total  
14 of 96h.

15 **Transfection with expression vectors.** For transient transfection of  
16 expression vectors into C2C12 cells, the "TurboFect" reagent (Fermentas) was  
17 employed according to the manufacturer's instructions. Transfection efficiency was  
18 controlled with a GFP expression vector and was 40-50% in all experiments. pCI-  
19 skNAC and pBK-CMV-Smyd1 were gifts from René St.-Arnaud, Montreal, and Haley  
20 Tucker, Austin, Texas, respectively; pcDNA-HA-SUMO-1, pcDNA-HA-Ubc9, pGFP-  
21 SUMO-1, and pEGFP-SuPr1 were gifts from Hans Will, Hamburg, Germany.

22 **Co-immunoprecipitation assay.** Whole cell extracts were prepared as  
23 previously described (Munz et al., 2002). Co-IP analyses were performed with equal  
24 amounts of total cellular protein (~500μg), which was incubated in a rotatory shaker  
25 with anti-Flag magnetic beads (Sigma Aldrich) at 4°C overnight. Beads were then  
26 washed twice with TBS (pH=7.4), followed by addition of 25μl 1x Laemmli buffer  
27 (without SDS). Subsequently, the beads were resuspended and boiled for 10min.  
28 Samples were separated by SDS-PAGE and analysed by Western blotting. All Co-IP  
29 analyses were performed at least three times with samples from at least three  
30 independent transfections.

1           **Transfection with specific siRNAs.** siRNA transfection was carried out using  
 2 pre-designed, specific siRNAs purchased from Sigma. For inhibition of *Nse2*  
 3 expression, two different, unrelated siRNA species were employed in parallel to rule  
 4 out off-target effects: *Nse2* siRNA-1: sense: 5'-CAUGGUUGAGUUUGCUGAAA-3',  
 5 antisense: 5'-UUUAGCAAACUCAACCAUG-3'; *Nse2* siRNA-2: sense: 5'-  
 6 GUCUACAAUCAUCAUGUA-3', antisense: 5'-UACAUGAUUGAUUGUAGAC-3'.  
 7 For inhibition of *Smyd1*, *skNAC*, and *Ubc9* expression, the following siRNAs were  
 8 used: *Smyd1* siRNA: sense: 5'-CACAUUUUGGUGUGAUGA-3', antisense: 5'-  
 9 UGAUCACACCAAAGAUGUG-3'; *skNAC* siRNA: sense: 5'-  
 10 GACAGUCCUGUUGAGAAAUU-3', antisense: 5'-  
 11 UUUCUCAACAGGAACUGUCUU-3'; *Ubc9* siRNA: sense: 5'-  
 12 CCAUCAACAGAUUUUAUU-3', antisense: 5'-AAUAAGAUCUGUUUGAUGG-3'. As  
 13 a negative control, a non-gene-specific, "scrambled" siRNA was employed:  
 14 scrambled siRNA: sense: 5'-CGUACGCGGAAUACUUCGAUU-3', antisense: 5'-  
 15 UCGAAGUAUCCGCGUACGUU-3'. C2C12 cells were transfected using the  
 16 transfection reagent Interferin (Polyplus Transfection) according to the  
 17 manufacturer's instructions.

18           **RNA isolation, Northern blot analysis, and qPCR.** RNA isolation and  
 19 Northern blot analysis were carried out as previously described (Munz *et al.*, 2002).  
 20 Semi-quantitative real time PCR analysis was carried out using the Rotor-Gene 2000  
 21 system (Corbett Research, Mortlake, Australia). Gene expression was analyzed  
 22 using the GoTaq qPCR Master Mix (Promega). For detection of calpain 1 and 3,  
 23 *skNAC*, *Smyd1*, and *Nse2*, self- and pre-designed primers (Qiagen QuantiTect  
 24 Primer Assays) were used. For detection of MyHCI, only pre-designed primers were  
 25 employed. Primer sequences are listed in Table 1. In each experiment, melting curve  
 26 analysis was performed to verify that a single transcript was produced. RT-qPCR  
 27 relative gene expression was calculated using the comparative CT ( $2^{-\Delta\Delta C_T}$ ) method,  
 28 where expression was normalized to GAPDH. Non-RT- and non-template controls  
 29 were run for all reactions. Unless otherwise specified, data from at least three  
 30 independent experiments were expressed as means  $\pm$  SEM,  $n=3-5$ . Significance  
 31 was accepted at  $P<0.05$ .

32           **Western blot analysis and immunofluorescence.** Western blot and  
 33 immunofluorescence analyses were carried out as previously described (Munz *et al.*,



1 2002), specifically, 20mM N-ethylmaleimide was added to the cell lysis buffer to  
2 inhibit de-sumoylation (Riquelme et al., 2006a,b). Cytoplasmic and nuclear extracts  
3 were prepared using the NE-PER Nuclear and Cytoplasmic Extraction Kit (Thermo  
4 scientific) according to manufacturer's instructions. Confocal laser scanning  
5 microscopy was performed with a Zeiss LSM 700 confocal microscope (Carl Zeiss  
6 Microscopy GmbH, Germany), equipped with a 63x glycerin immersion lens. Digital  
7 images were processed using the Zeiss LSM ZEN software 2010 (Carl Zeiss). All  
8 antibodies employed in the study are listed in Table 2. For confocal microscopy,  
9 secondary antibodies coupled with Alexa Fluor dyes were used. All immunoblots  
10 were performed at least three times with samples from at least three independent  
11 transfections.

12 **Purification of sumoylated proteins.** To isolate sumoylated proteins from  
13 crude cell lysates, the SUMO-Qapture-T Kit (Enzo Life Sciences) was used according  
14 to the manufacturer's instructions.

15

16

1 **Acknowledgements**

2 We thank Hans Will (HPI Hamburg) for pcDNA-HA-SUMO-1, pcDNA-HA-Ubc9, and  
3 pEGFP-SuPr1, Haley Tucker, University of Texas at Austin, for pBK-CMV-Smyd1,  
4 and René St.-Arnaud, McGill University, Montreal, for pCI-skNAC. This project was  
5 specifically funded by the Deutsche Forschungsgemeinschaft (GRK1631 - Myograd)  
6 and the German Foundation for Cardiac Research (DSHF). Work in the authors'  
7 laboratory is furthermore supported by grants from the the German Research  
8 Foundation (DFG Mu 1556 5-1), the intramural fortune program of the Tubingen  
9 University Medical Clinic, and a grant from the Friede-Springer-Herz-Stiftung (to  
10 B.M.).

11

12 **Conflict of interest**

13 The authors declare no conflict of interest.

14

1 **References**

2 **Berger, F., Berkholz, J., Breustedt, T., Ploen, D. and Munz, B.** (2012). Skeletal  
3 muscle-specific variant of nascent polypeptide associated complex alpha (skNAC):  
4 Implications for a specific role in mammalian myoblast differentiation. *Eur. J. Cell*  
5 *Biol.* **91**, 150-155.

6 **Berkholz, J., Zakrzewicz, A. and Munz, B.** (2013). skNAC depletion stimulates  
7 myoblast migration and perturbs sarcomerogenesis by enhancing calpain 1 and 3  
8 activity. *Biochem. J.* **453**, 303-310.

9 **Brouwer, A.K., Schimmel, J., Wiegant, J.C., Vertegaal, A.C., Tanke, H.J. and**  
10 **Dirks, R.W.** (2009). Telomeric DNA mediates de novo PML body formation. *Mol.*  
11 *Biol. Cell* **20**, 4804-4815.

12 **Chung, S.S., Ahn, B.Y., Kim, M., Kho, J.H., Jung, H.S. and Park, K.S.** (2011a).  
13 SUMO modification selectively regulates transcriptional activity of peroxisome-  
14 proliferator-activated receptor  $\gamma$  in C2C12 myotubes. *Biochem. J.* **433**, 155-161.

15 **Chung, I., Leonhardt, H. and Rippe, K.** (2011b). De novo assembly of a PML  
16 nuclear subcompartment occurs through multiple pathways and induces telomere  
17 elongation. *J. Cell Sci.* **124**, 3603-3618.

18 **Garcia-Dominguez, M. and Reyes, J.C.** (2009). SUMO association with repressor  
19 complexes, emerging routes for transcriptional control. *Biochim. Biophys. Acta* **1789**,  
20 451-459.

21 **Giorgino, F., de Robertis, O., Laviola, L., Montrone, C., Perrini, S., McCowen,**  
22 **K.C. and Smith, R.J.** (2000). The sentrin-conjugating enzyme mUbc9 interacts with  
23 GLUT4 and GLUT1 glucose transporters and regulates transporter levels in skeletal  
24 muscle cells. *Proc. Natl. Acad. Sci. USA* **97**, 1125-1130.

25 **Glass, D.J.** (2007). Two tales concerning skeletal muscle. *J. Clin. Invest.* **117**, 2388-  
26 2391.

27 **Grégoire, S. and Yang, X.J.** (2005). Association with class IIa histone deacetylases  
28 upregulates the sumoylation of MEF2 transcription factors. *Mol. Cell. Biol.* **25**, 2273-  
29 2287.

- 1 **Hannoun, Z., Greenhough, S., Jaffray, E., Hay, R.T. and Hay, D.C.** (2010). Post-  
2 translational modification by SUMO. *Toxicology* **278**, 288-293.
- 3 **Hsu, Y.H., Sarker, K.P., Pot, I., Chan, A., Netherton, S.J. and Bonni, S.** (2006).  
4 Sumoylated SnoN represses transcription in a promoter-specific manner. *J. Biol.*  
5 *Chem.* **281**, 33008-33018.
- 6 **Just, S., Meder, B., Berger, I.M., Etard, C., Trano, N., Patzel, E., Hassel, D.,**  
7 **Marquart, S., Dahme, T., Vogel, B., Fishman, M.C., Katus, H.A., Strähle, U. and**  
8 **Rottbauer, W.** (2011). The myosin-interacting protein SMYD1 is essential for  
9 sarcomere organization. *J. Cell Sci.* **124**, 3127-3136.
- 10 **Kampmann, U., Christensen, B., Nielsen, T.S., Pedersen, S.B., Ørskov, L., Lund,**  
11 **S., Møller, N. and Jessen, N.** (2011). GLUT4 and UBC9 protein expression is  
12 reduced in muscle from type 2 diabetic patients with severe insulin resistance. *PLoS*  
13 *One* **6**(11):e27854.
- 14 **Kang, J., Gocke, C.B. and Yu, H.** (2006). Phosphorylation-facilitated sumoylation of  
15 MEF2C negatively regulates its transcriptional activity. *BMC Biochem.* Feb. 14, **7**:5.
- 16 **Lallemand-Breitenbach, V. and de Thé, H.** (2010). PML nuclear bodies. *Cold*  
17 *Spring Harb. Perspect. Biol.* **2**, a000661.
- 18 **Lee, H., Quinn, J.C., Prasanth, K.V., Swiss, V.A., Economides, K.D., Camacho,**  
19 **M.M., Spector, D.L. and Abate-Shen, C.** (2006). PIAS1 confers DNA-binding  
20 specificity on the Msx1 homeoprotein. *Genes Dev.* **20**, 784-794.
- 21 **Li, H., Randall, W.R. and Du, S.J.** (2009). skNAC (skeletal Naca), a muscle-specific  
22 isoform of Naca (nascent polypeptide-associated complex alpha), is required for  
23 myofibril organization. *FASEB J.* **23**, 1988-2000.
- 24 **Li, H., Xu, J., Bian, Y.H., Rotilant, P., Shen, T., Chu, W., Zhang, J., Schneider, M.**  
25 **and Du, S.J.** (2011). Smyd1b\_tv1, a key regulator of sarcomere assembly, is  
26 localized on the M-line of skeletal muscle fibers. *PLoS One* **6**(12) e28524
- 27 **Li, H., Zhong, Y., Wang, Z., Gao, J., Xu, J., Chu, W., Zhang, J., Fang, S. and Du,**  
28 **S.** (2013). Smyd1b is required for skeletal and cardiac muscle function in zebrafish.  
29 *Mol. Biol. Cell* **24**, 3511-3521.

- 1 **Luan, Z., Liu, Y., Stuhlmiller, T.J., Marquez, J. and Garcia-Castro, M.I.** (2012).  
2 SUMOylation of Pax7 is essential for neural crest and muscle development. *Cell.*  
3 *Mol. Life Sci.*, 2012 Dec 18.
- 4 **Munz, B., Wiedmann, M., Lochmüller, H. and Werner, S.** (1999). Cloning of novel  
5 injury-regulated genes. Implications for an important role of the muscle-specific  
6 protein skNAC in muscle repair. *J. Biol. Chem.* **274**, 13305-13310.
- 7 **Munz, B., Hildt, E., Springer, M.L. and Blau, H.M.** (2002). RIP2, a checkpoint in  
8 myogenic differentiation. *Mol. Cell. Biol.* **22**, 5879-5886.
- 9 **Park, C.Y., Pierce, S.A., von Drehle, M., Ivey, K.N., Morgan, J.A., Blau, H.M. and**  
10 **Srivastava, D.** (2010). skNAC, a Smyd1-interacting transcription factor, is involved in  
11 cardiac development and skeletal muscle growth and regeneration. *Proc. Natl. Acad.*  
12 *Sci. USA* **107**, 20750-20155.
- 13 **Potthoff, M.J. and Olson, E.N.** (2007). MEF2: a central regulator of diverse  
14 developmental programs. *Development* **134**, 4131-4140.
- 15 **Potts, P.R.** (2009). The Yin and Yang of the MMS21-SMC5/6 SUMO ligase complex  
16 in homologous recombination. *DNA Repair* **8**, 499-506.
- 17 **Potts, P.R. and Yu, H.** (2007). The SMC5/6 complex maintains telomere length in  
18 ALT cancer cells through SUMOylation of telomere-binding proteins. *Nat. Struct. Mol.*  
19 *Biol.* **14**, 581-590.
- 20 **Riquelme, C., Barthel, K.K. and Liu, X.** (2006a). SUMO-1 modification of MEF2A  
21 regulates its transcriptional activity. *J. Cell. Mol. Med.* **10**, 132-144.
- 22 **Riquelme, C., Barthel, K.K.B., Qin, X.-F. and Liu, X.** (2006b). Ubc9 expression is  
23 essential for myotube formation in C2C12 cells. *Exp. Cell Res.* **312**, 2132-2141.
- 24 **Rothenbusch, U., Sawatzki, M., Chang, Y., Caesar, S. and Schlenstedt, G.**  
25 (2012). Sumoylation regulates Kap114-mediated nuclear transport. *EMBO J.* **31**,  
26 2461-2472.
- 27 **Sims, R.J. 3<sup>rd</sup>, Weihe, E.K., Zhu, L., O'Malley, S., Harriss, J.V. and Gottlieb, P.D.**  
28 (2002). m-Bop, a repressor protein essential for cardiogenesis, interacts with skNAC,  
29 a heart- and muscle-specific transcription factor. *J. Biol. Chem.* **277**, 26524-26529.

- 1 **Simpson-Lavy, K.J. and Johnston, M.** (2013). SUMOylation regulates the SNF  
2 protein kinase. *Proc. Natl. Acad. Sci. USA* **110**, 17432-17437.
- 3 **Sorimachi, H. and Ono, Y.** (2012). Regulation and physiological roles of the calpain  
4 system in muscular disorders. *Cardiovasc. Res.* **96**, 11-22.
- 5 **Stephan, A.K., Kliszczak, M. and Morrison, C.G.** (2011). The Nse2/Mms21 SUMO  
6 ligase of the Smc5/6 complex in the maintenance of genome stability. *FEBS Lett.*  
7 **585**, 2907-2913.
- 8 **Tan, X., Rotllant, J., Li, H., De Deyne, P. and Du, S.J.** (2006). Smyd1, a histone  
9 methyltransferase, is required for myofibril organization and muscle contraction in  
10 zebrafish embryos. *Proc. Natl. Acad. Sci. USA* **103**, 2713-2718.
- 11 **Wang, Y., Shankar, S.R., Kher, D., Ling, B.M.T. and Taneja, R.** (2013).  
12 Sumoylation of the basic helix-loop-helix transcription factor Sharp-1 regulates  
13 recruitment of the histone methyltransferase and function in myogenesis. *J. Biol.*  
14 *Chem.* **288**, 17654-17662.
- 15 **Werner, A. and Melchior, F.** (2012). SUMO unloads the Kap114 cab. *EMBO J.* **31**,  
16 2439-2440.
- 17 **Wiedmann, B., Sakai, H., Davis, T.A. and Wiedmann, M.** (1994). A protein complex  
18 required for signal-sequence-specific sorting and translocation. *Nature* **370**, 434-440.
- 19 **Wrighton, K.H., Liang, M., Bryan, B., Luo, K., Liu, M., Feng, X.H. and Lin, X.**  
20 (2007). Transforming growth factor-beta-independent regulation of myogenesis by  
21 SnoN sumoylation. *J. Biol. Chem.* **282**, 6517-6524.
- 22 **Yotov, W.V. and St.-Arnaud, R.** (1996). Differential splicing-in of a proline-rich exon  
23 converts alphaNAC into a muscle-specific transcription factor. *Genes Dev.* **10**, 1763-  
24 1772.
- 25 **Zhao, J.** (2007). Sumoylation regulates diverse biological processes. *Cell. Mol. Life*  
26 *Sci.* **64**, 3017-3033.
- 27

1 **Figure legends**

2 **Fig.1. skNAC binds to the E3 SUMO ligase mammalian Nse2.** Co-  
3 immunoprecipitation of a FLAG-tagged skNAC fragment (\*, aa 1712-1995, refer to  
4 schematic drawing) and endogenous Nse2 from lysates of C2C12 murine myoblasts.  
5 FLAG-tagged NAD<sup>+</sup> kinase (NADK) was used as a negative control.

6 **Fig.2. Nse2 expression in myogenesis, with and without inhibition of skNAC**  
7 **and Smyd1 expression.**

8 (A) C2C12 myoblasts were transfected with skNAC- or Smyd1-specific siRNAs, an  
9 unspecific (“scrambled”) control, or left untreated. Cells were harvested at different  
10 time points after the induction of differentiation as indicated, and analyzed for *Nse2*  
11 and *skNAC* or *Smyd1* expression via Northern blot. Concentration of the 18S rRNA  
12 transcript was analyzed as a control for equal loading (bottom panels).

13 (B) In parallel, *Nse2* expression was quantified 24 and 96h after the induction of  
14 differentiation via qPCR analysis.

15 (C) 0h, 48h, and 96h after the induction of differentiation, protein lysates were  
16 generated from the cells and analyzed for Nse2 protein levels by Western blot. The  
17 blot was reprobbed with an antibody directed against  $\alpha$ -tubulin as a control for equal  
18 loading (bottom panel).

19 (D) Subcellular Nse2 localization was also analyzed in untransfected cells by  
20 immunofluorescence and confocal laser scanning 0h, 48h and 96h after the  
21 induction of differentiation using an Nse2-specific antibody. Note the spotty, nuclear  
22 Nse2 localization in some cells (arrowheads, 0h and 48h) and the prominent  
23 perinuclear staining in others (arrows) (0h), as well as the almost complete nuclear-  
24 to-cytosolic translocation of the protein 120h after the induction of differentiation.  
25 Representative pictures of at least n=3 independent experiments are shown.

26 (E) Analysis of subcellular localization of the Nse2 protein via cell fractionation and  
27 Western blot. Nuclear/cytoplasmic fractionation was performed during C2C12  
28 differentiation, and Western blotting was performed on 30 $\mu$ g of cell extract for each  
29 time point. Membranes were probed with antibodies against Nse2, emerin (a nuclear

1 marker), and  $\alpha$ -tubulin (a cytoplasmic marker). Note that emerin was not detectable  
2 in the cytoplasmic and  $\alpha$ -tubulin was hardly detectable in the nuclear fraction,  
3 indicating effectivity of the fractionation.

#### 4 **Fig.3. Inhibition of *Nse2* expression and effects on myogenic differentiation.**

5 C2C12 cells were transfected with an *Nse2*-specific siRNA or an unrelated  
6 “scrambled”) control.

7 (A) At different time points after the induction of differentiation, total cellular RNA and  
8 total protein were isolated from the cells and *Nse2* expression was determined at the  
9 mRNA level by qPCR and at the protein level by Western blot as indicated. \*:  $p < 0.05$ .

10 (B) Cell morphology was analyzed in siRNA-transfected cells and in controls by light  
11 microscopy 96h after the induction of differentiation. Representative pictures of at  
12 least  $n=3$  independent experiments are shown. The cells' fusion index (percent nuclei  
13 in cells with at least three nuclei) was also counted (bottom panel; mean with SEM;  
14  $n=3$ ).

15 (C) Expression of myogenic differentiation markers was analyzed in siRNA-  
16 transfected cells and controls at the RNA and at the protein level 72h after the  
17 induction of differentiation as indicated. \*:  $p < 0.05$ .

18 (D) Sarcomerogenesis was analyzed in *Nse2* siRNA- and scr-transfected cells by  
19 immunofluorescence staining of  $\alpha$  sarcomeric actin (top panels), and MyHC (bottom  
20 panels) 96h after the induction of differentiation. Representative pictures of at least  
21  $n=3$  independent experiments are shown. DAPI was used to stain and visualize  
22 nuclei.

23 (E) *Calpain 1* expression in *Nse2* siRNA-transfected cells and controls was analyzed  
24 by qPCR and Western blot analysis 72h after the induction of differentiation as  
25 indicated. \*:  $p < 0,05$ .

26 (F) *Nse2* siRNA-transfected cells were treated with the calpain inhibitor ALLN (N-[N-  
27 (N-Acetyl-L-leucyl)-L-leucyl]-L-norleucine) before the induction of differentiation (right  
28 panel). *Nse2* siRNA-transfected C2C12 cells and scr-transfected controls were



1 differentiated for 96h. Subsequently, cells were analyzed for  $\alpha$  sarcomeric actin  
2 intracellular distribution by confocal microscopy. Nuclei were stained with DAPI.

3 **Fig.4. Global inhibition of sumoylation using ginkgolic acid or transfection with**  
4 **a specific siRNA directed against Ubc9 inhibits some aspects of myogenic**  
5 **differentiation.**

6 C2C12 myoblasts were transfected with a specific siRNA directed against the sole E2  
7 SUMO ligase Ubc9 or treated with ginkgolic acid. Cells transfected with an unspecific  
8 (“scrambled”) control siRNA or treated with an equal amount of the ginkgolic acid  
9 solvent DMSO served as controls as indicated.

10 (A) Sumoylated proteins were detected in total cellular lysates by Western blot 48h  
11 after the induction of differentiation as indicated. A band most likely corresponding to  
12 sumoylated RanGAP1 is indicated. In the cells that had been transfected with the  
13 Ubc9-specific siRNA, *Ubc9* expression was also quantified by qPCR to confirm  
14 efficiency of repression. \*:  $p < 0.05$ .

15 (B) 96h after the induction of differentiation, cell morphology was analyzed by light  
16 microscopy. Note the reduced formation of multinucleate myotubes in the cells that  
17 had been treated with ginkgolic acid or transfected with the Ubc9-specific siRNA. In  
18 addition, the cells’ fusion index (percent nuclei in cells with at least three nuclei) was  
19 counted; mean with SEM;  $n=3$ ). Representative pictures of at least  $n=3$  independent  
20 experiments are shown.

21 (C) 72h after the induction of differentiation, expression of specific myogenic  
22 differentiation markers was analyzed in the cells by qPCR and Western blot analysis  
23 as indicated. The two bands representing the Smyd1 signal on the Western blot are  
24 both specific and might represent differentially sumoylated species.

25 (D) *Calpain 1* and *3* gene expression was analyzed in ginkgolic acid-treated or Ubc9  
26 siRNA-transfected cells by qPCR 72h after the induction of differentiation. In the  
27 ginkgolic acid-treated cells, *calpain 1* expression was also analyzed by Western blot  
28 as indicated. \*:  $p < 0.05$ .

1 (E) Sarcomerogenesis was analyzed in Ubc9 siRNA-transfected cells via  
2 immunofluorescence and confocal laser scanning analysis of  $\alpha$  sarcomeric actin and  
3 MyHC 96h after the induction of differentiation. Note the strong staining immediately  
4 beneath the plasma membrane in contrast to the weak and diffuse staining of the cell  
5 center in the myotubes that had been transfected with the Ubc9 siRNA, indicative of  
6 disturbed sarcomerogenesis. Nuclei were stained with DAPI. Representative pictures  
7 of at least n=3 independent experiments are shown.

8 **Fig.5. Depletion of Nse2 or inhibition of global protein sumoylation partially**  
9 **blocks the nuclear-to-cytosolic translocation of skNAC and Smyd1.**

10 C2C12 myoblasts were transfected with an Nse2-specific siRNA and differentiated  
11 for 96h. Subsequently, subcellular localization of the skNAC and Smyd1 proteins was  
12 analyzed via immunofluorescence/confocal laser scanning using specific antibodies  
13 (A,B), or via cell fractionation and Western blot with emerin and  $\alpha$ -tubulin as loading  
14 controls (C). Note the prominent, spotty nuclear skNAC staining in the cells that had  
15 been transfected with the Nse2-specific siRNA (A). A similar pattern was observed  
16 when staining with a Smyd1-specific antibody (B). (D) and (E) skNAC and Smyd1  
17 were also partially retained in the nucleus when blocking global sumoylation via Ubc9  
18 siRNA transfection (D), or ginkgolic acid treatment (E, only analyzed for skNAC). The  
19 bottom panels in (A), (B), and (E) show higher magnifications. Representative  
20 pictures of at least n=3 independent experiments are shown.

21 **Fig.6. Colocalization of Nse2 (A) and skNAC (B) with PML nuclear bodies and**  
22 **SUMO-1 (C).**

23 C2C12 cells were co-stained with PML (green) and Nse2/skNAC (red) 0h (A, Nse2)  
24 or 48h (B, skNAC) after the induction of differentiation. Cells co-transfected with  
25 pGFP-SUMO-1 and pCI-skNAC were switched to DM for 48h and then co-stained  
26 (C). Superimposing the two colors (merge) results in a yellow signal, where both  
27 proteins co-localize.

28

29

1 **Fig.7. Smyd1 is sumoylated and might be a Nse2 target.**

2 (A) Alignment of the Smyd1 proteins of different species; potential sumoylation motifs  
3 are indicated. Note the well-conserved LKDD motif and the additional alternative  
4 sumoylation motif found in the *m. musculus* sequence.

5 (B) SUMO assay. Affinity chromatography with immobilized SUMO-1 antibody.  
6 C2C12 cells were transfected with expression vectors as indicated and differentiated  
7 for 48h. Subsequently, lysates were purified via affinity chromatography for SUMO-1.  
8 Total cellular lysates (“input”) and sumoylated proteins (“eluate”) were analyzed by  
9 Western blot as indicated.

10 (C) pBK-CMV-Smyd1 and pcDNA-HA-SUMO-1HA expression plasmids were co-  
11 transfected into C2C12 cells. pcDNA-HA-Ubc9 was cotransfected in parallel as a  
12 negative control. 48h after the induction of differentiation, immunoprecipitation was  
13 carried out using an HA-specific antibody and sumoylated Smyd1 was detected by  
14 Western blot using a Smyd1-specific antibody. HA-SUMO-1 and HA-Ubc9 both run at  
15 17-18kD. Note the strong decline in the signal specific for sumoylated Smyd1 when  
16 cells were co-transfected with Nse2-specific siRNA or a SuPr1 expression vector  
17 (pEGFP-SuPr1).

18 **Fig.8. Partially hypothetic Model of skNAC, Smyd1, and Nse2 functions in**  
19 **muscle cells.** In early myogenesis, skNAC and Smyd1 are found in the nucleus,  
20 where they might regulate transcription, presumably by influencing histone  
21 methylation via Smyd1’s SET domain, and potentially histone deacetylation via  
22 Smyd1’s MYND domain. Particularly, the skNAC/Smyd1 complex directly or indirectly  
23 inhibits transcription of the genes encoding calpains 1 and 3, the latter being potent  
24 inhibitors of sarcomere formation (Berkholz *et al.*, 2013, and references therein). At  
25 later stages of myogenesis, Nse2 binds to the skNAC component of the complex and  
26 sumoylates Smyd1, which allows translocation of the complex into the cytoplasm,  
27 where at least Smyd1 physically associates with sarcomeric structures (Just *et al.*,  
28 2011, Li *et al.*, 2011) and might thus also directly be involved in the regulation of  
29 sarcomerogenesis.

30

## Mus musculus skNAC (2187aa)

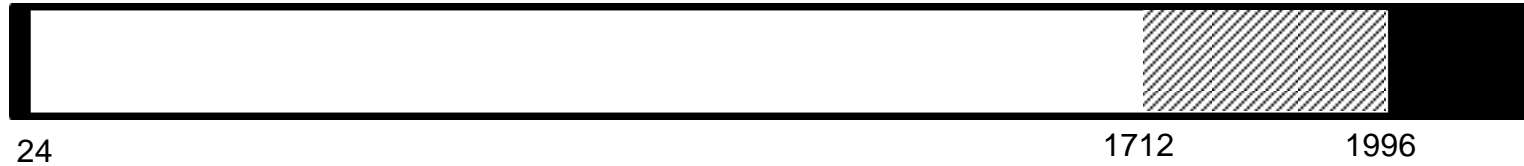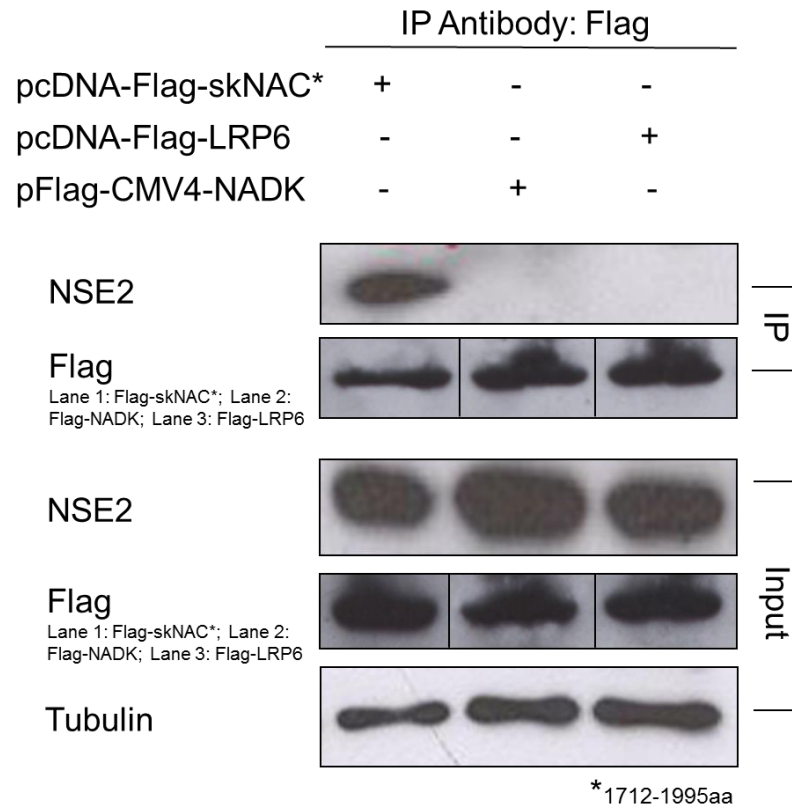

Fig.2

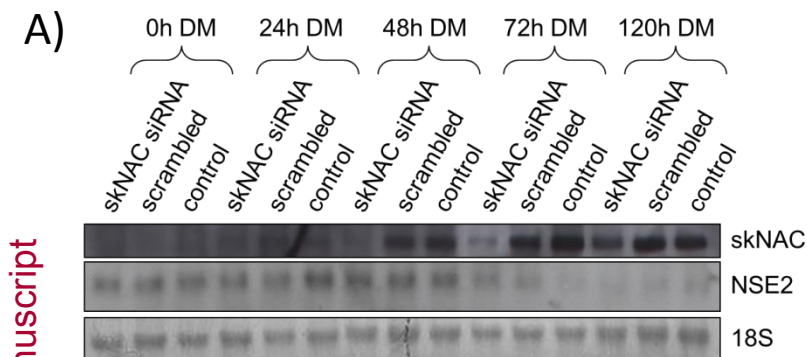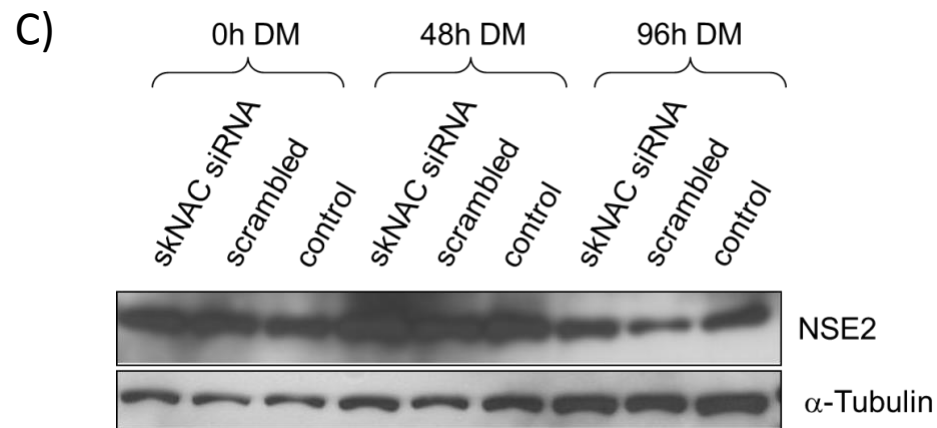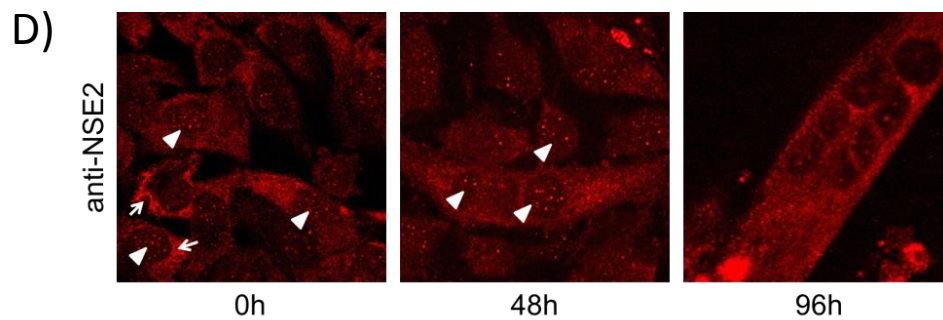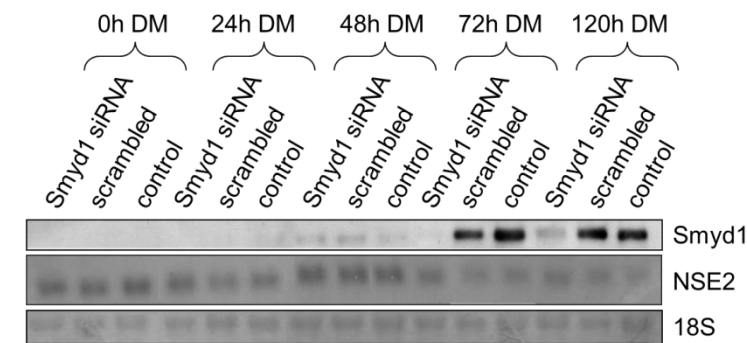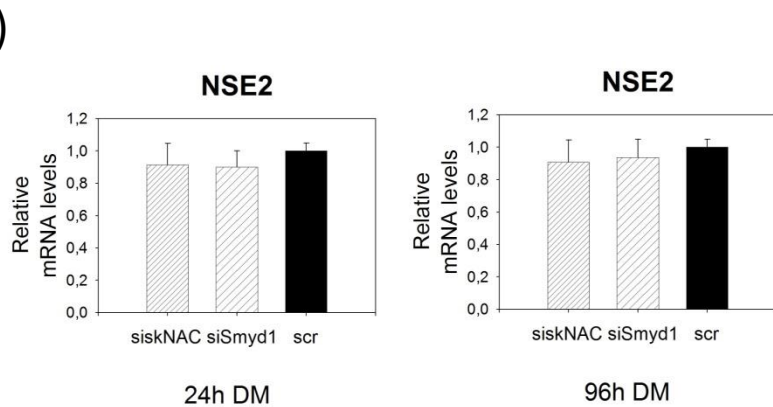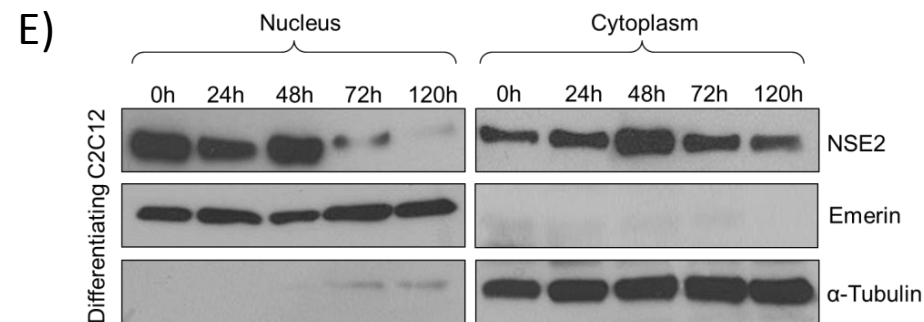

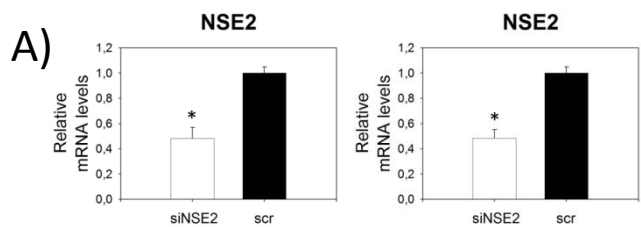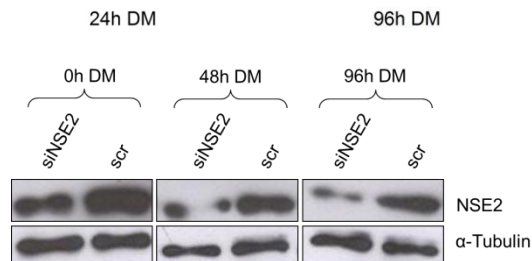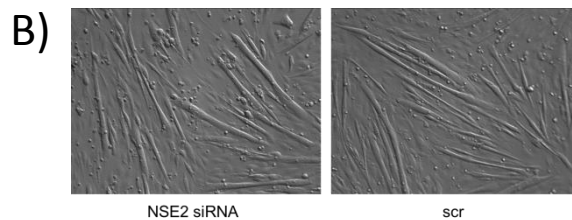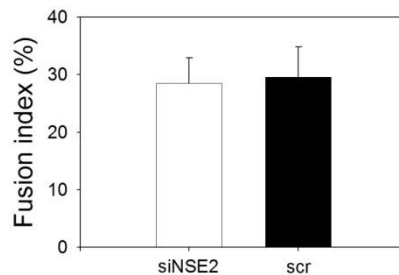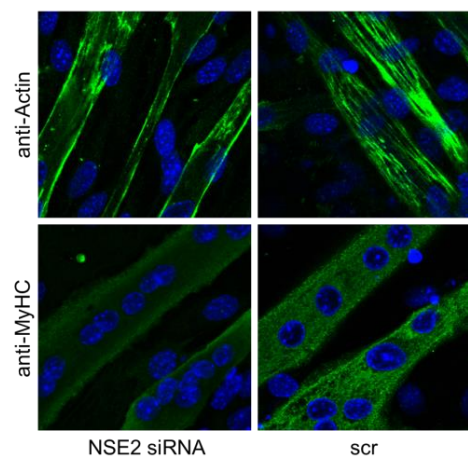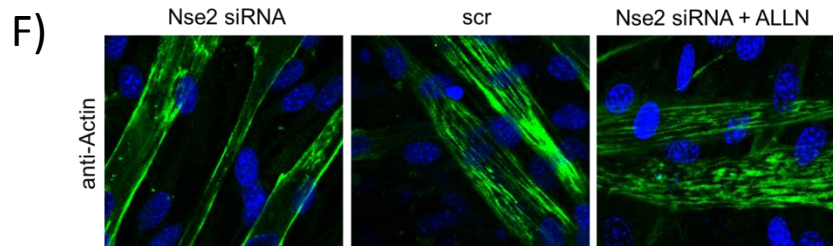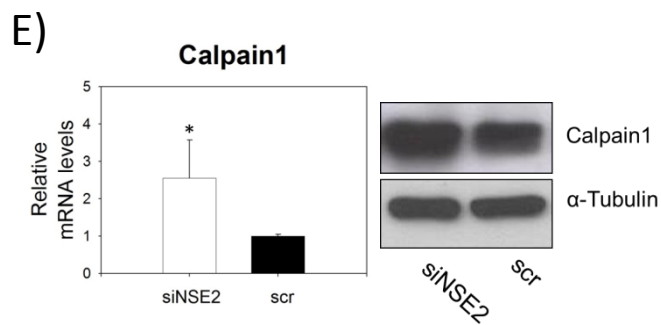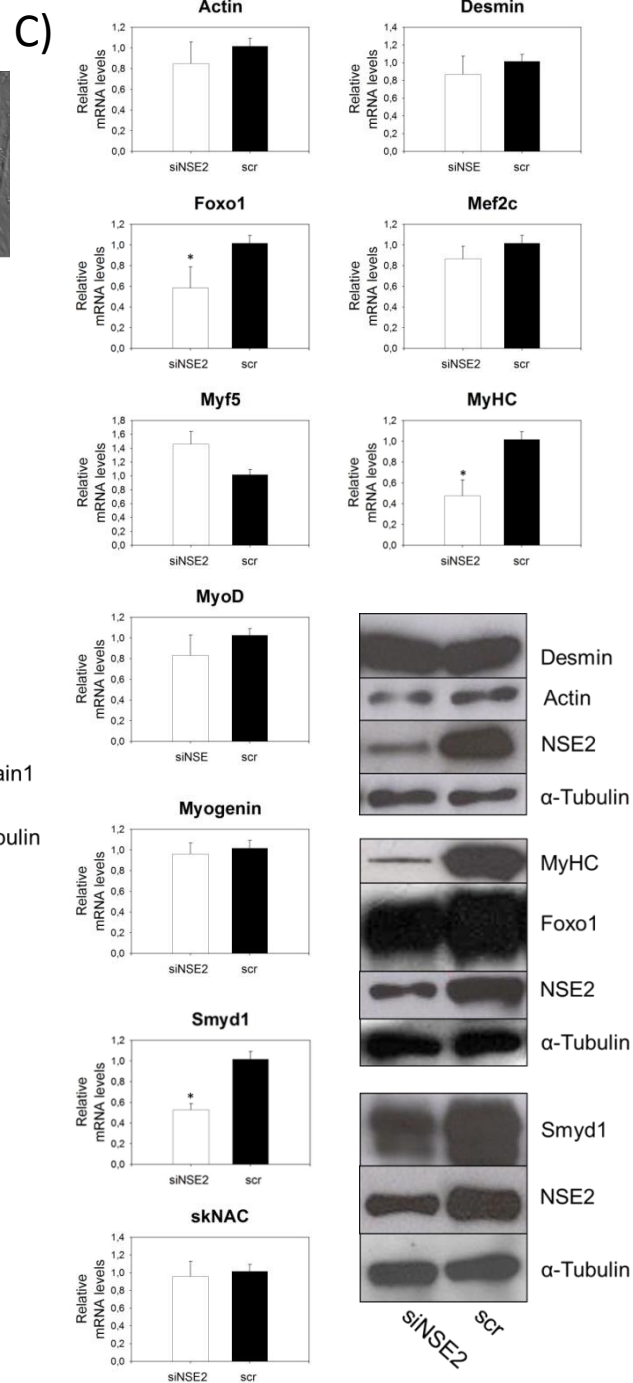

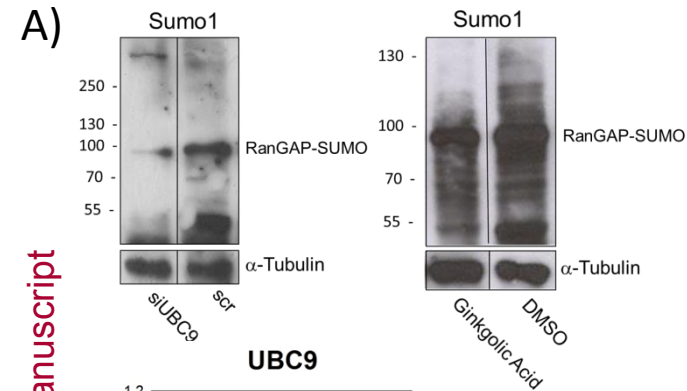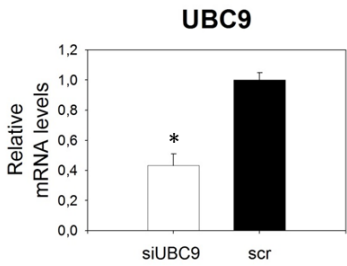

**C)**

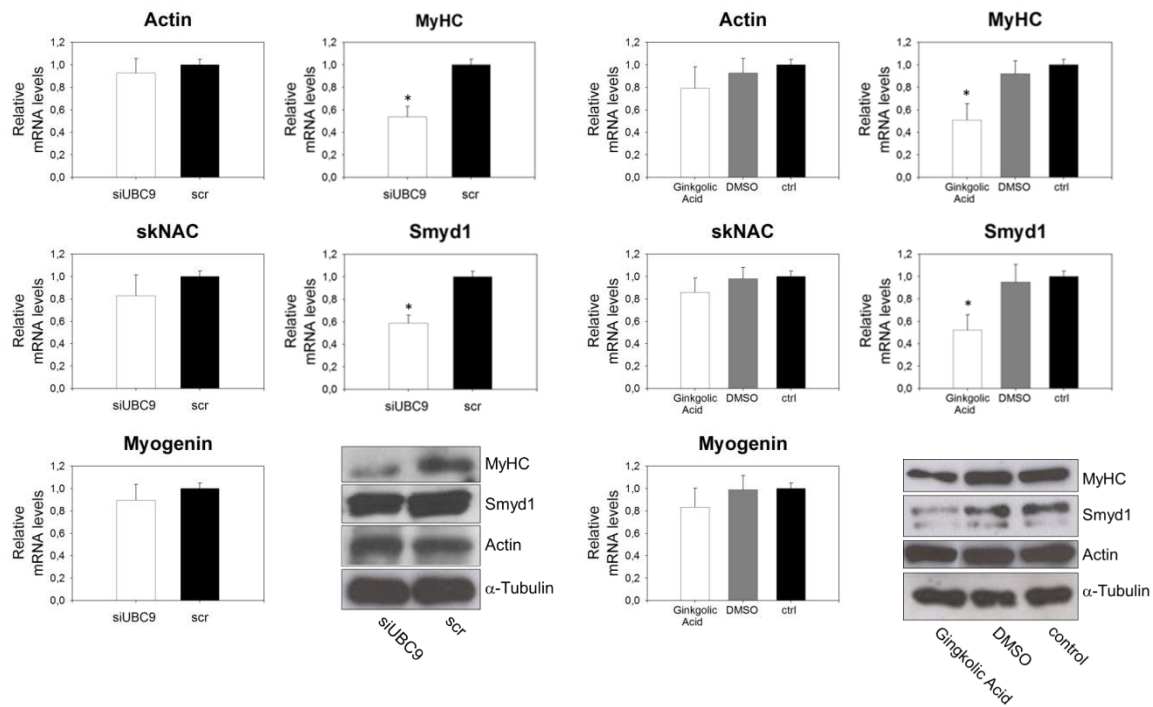

**D)**

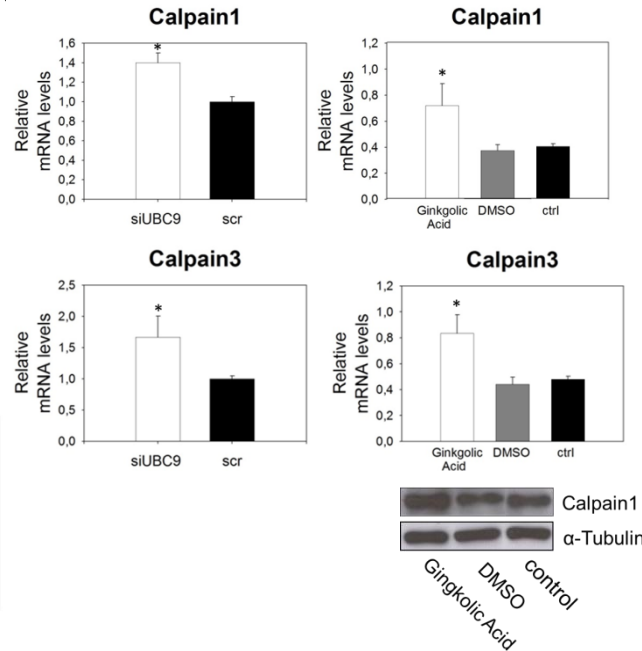

**E)**

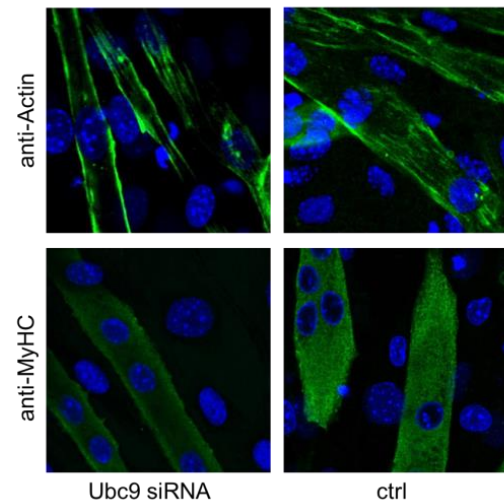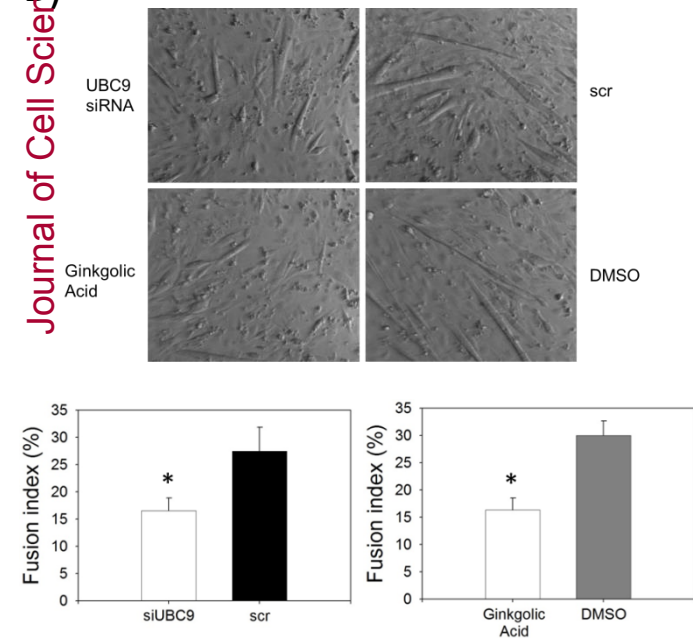

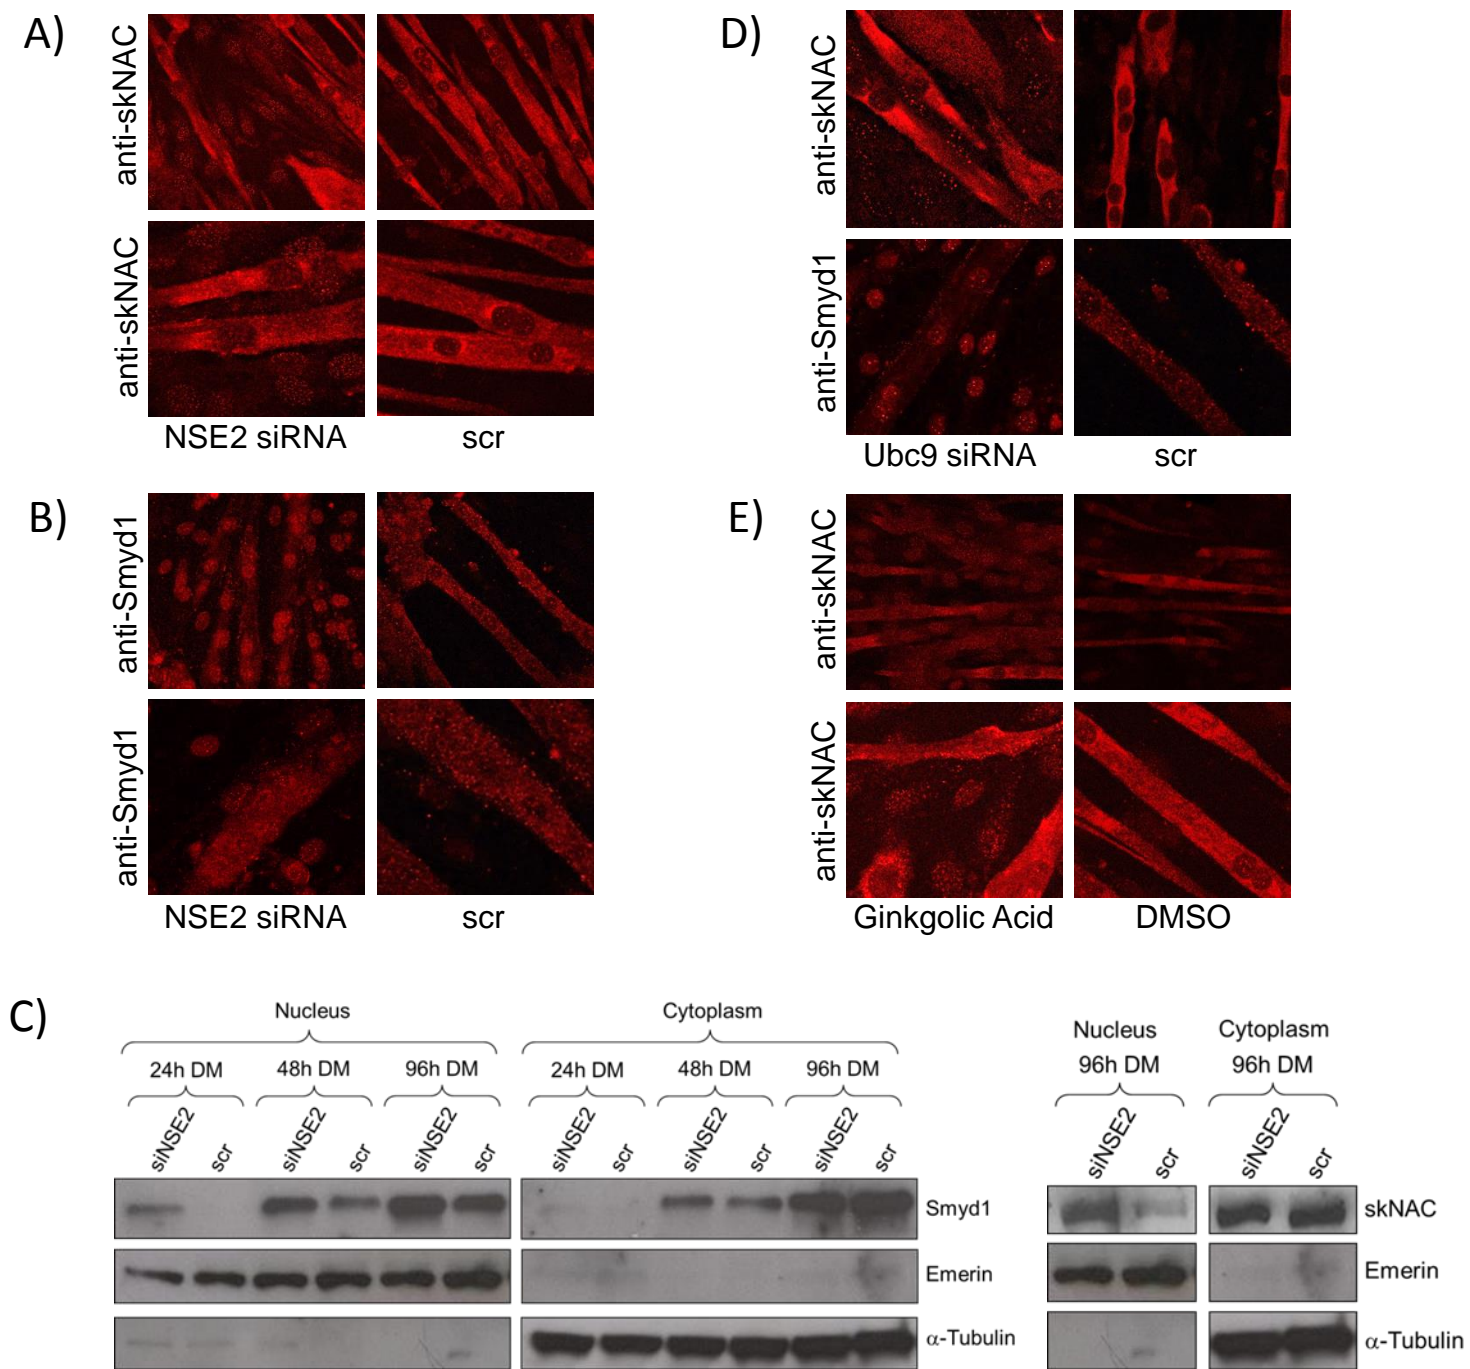



Fig.6

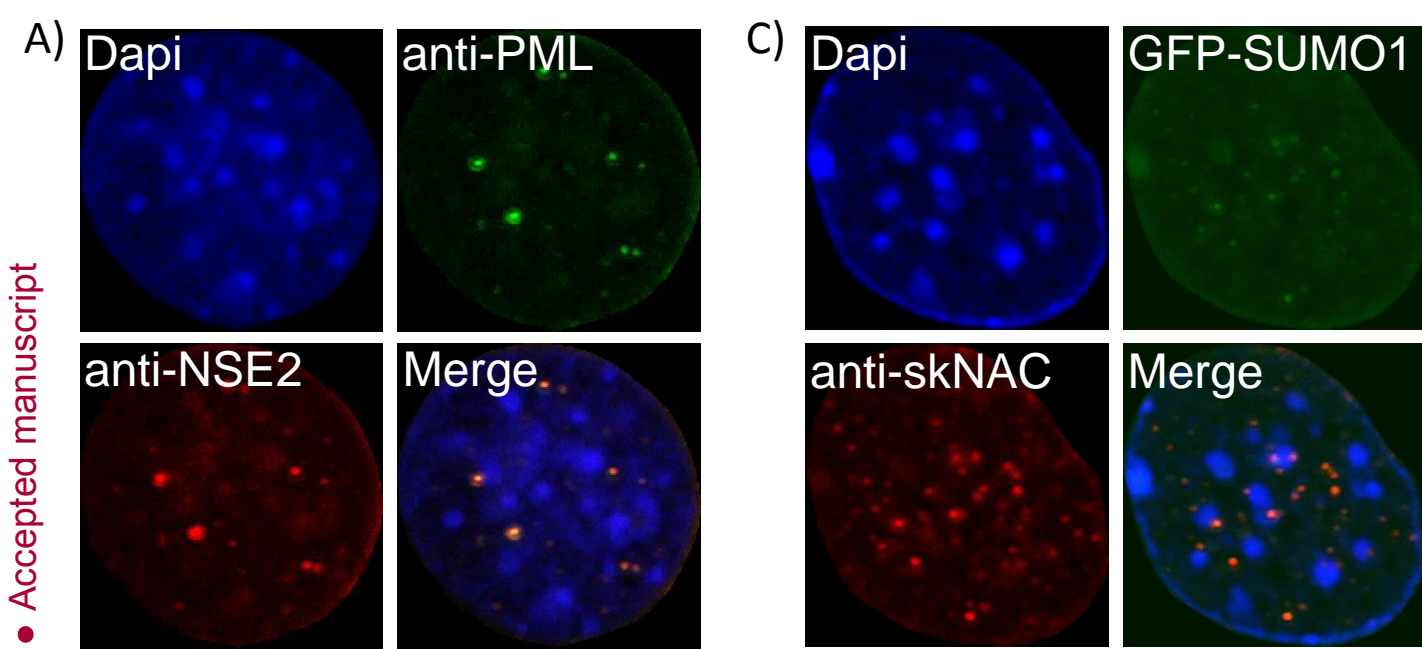

Journal of Cell Science • Accepted manuscript

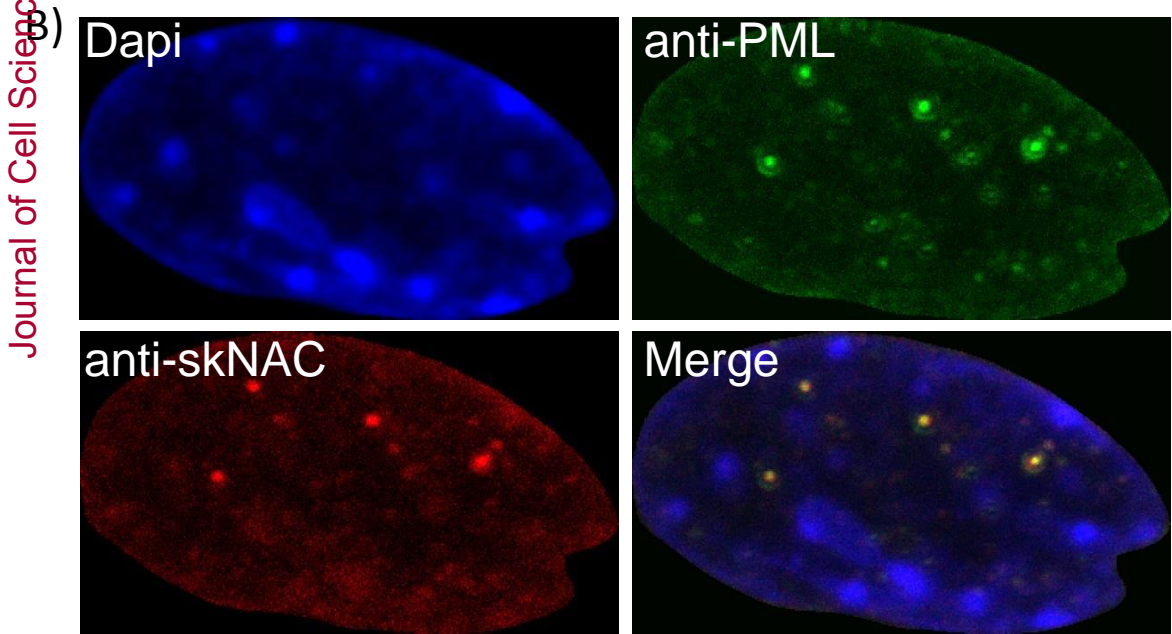

Fig.7

A)

|                      |       |         |                    |       |
|----------------------|-------|---------|--------------------|-------|
| <b>H.sapiens</b>     | 275 - | CEHCQKK | LKDDLFLGVKDNPKPSQE | - 301 |
| <b>P.troglodytes</b> | 275 - | CEHCQKK | LKDDLFLGVKDNPKPSQE | - 301 |
| <b>M.mulatta</b>     | 262 - | CEHCQKK | LKDDLFLGVKDNPKVHAT | - 288 |
| <b>C.lupus</b>       | 275 - | CEHCQKK | LKDDLFLGVKDDPKPSQE | - 301 |
| <b>B.taurus</b>      | 275 - | CEHCQKG | LKDDLFLGVKDNPKPSQE | - 301 |
| <b>M.musculus</b>    | 262 - | CEHCQKG | LKDDLFLAAKEDPKPSQE | - 288 |
| <b>R.norvegicus</b>  | 275 - | CEHCQKG | LKDDLFLAVKEDPKPSQE | - 301 |

B)

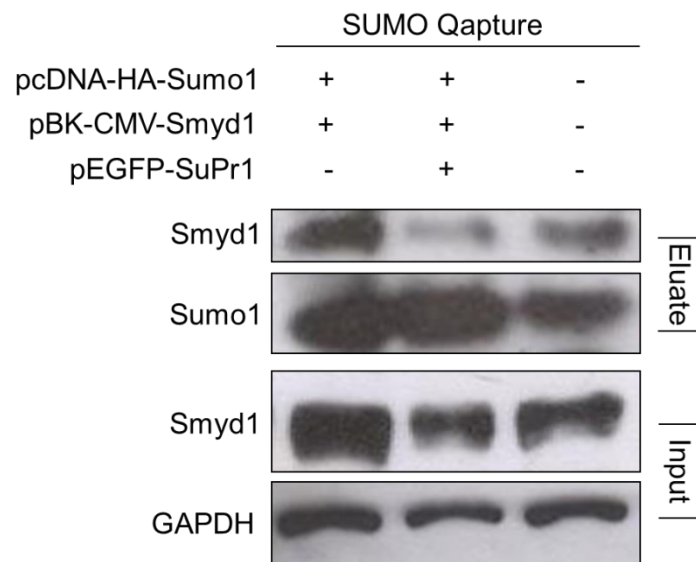

C)

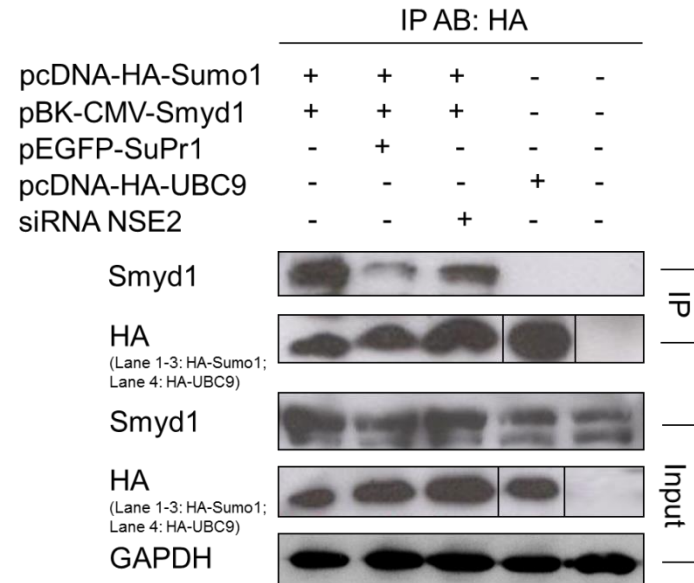

Fig.8

early myogenesis

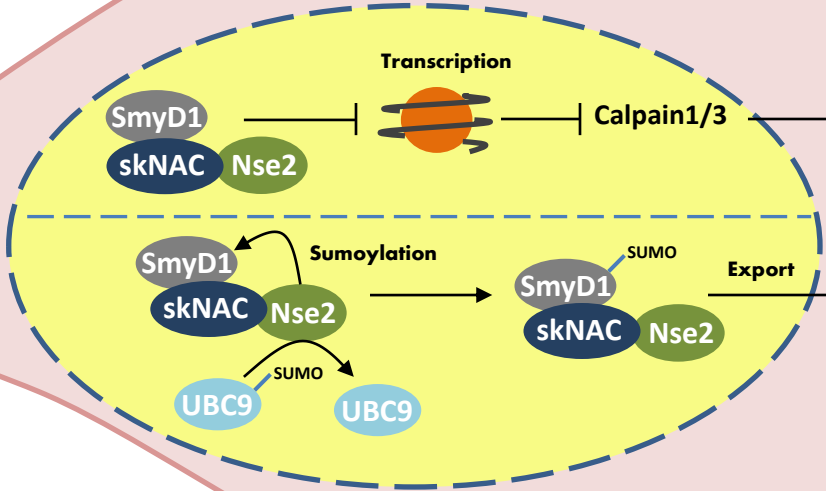

Calpain1/3

Transcription

SmyD1  
skNAC  
Nse2

Sumoylation

SmyD1  
skNAC  
Nse2

SmyD1  
skNAC  
Nse2

Export

SmyD1  
skNAC  
Nse2

Sarcomerogenesis

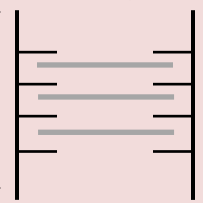

late myogenesis

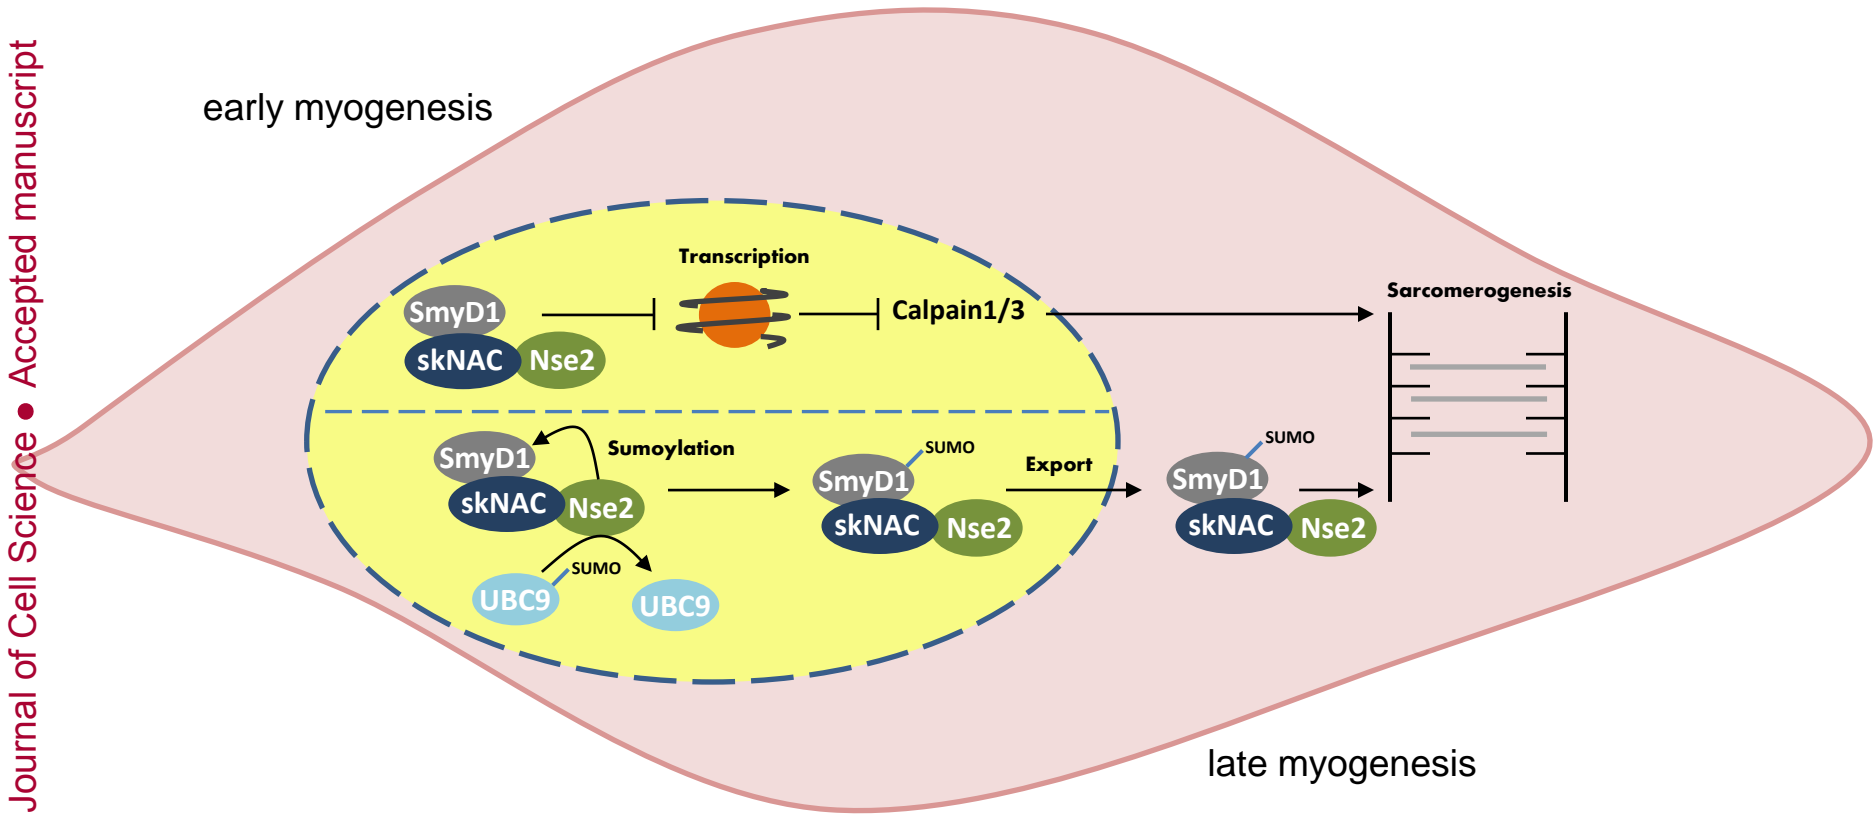

| <b>Gene name</b> | <b>Forward primer (5'→3')</b> | <b>Reverse primer (5'→3')</b> |
|------------------|-------------------------------|-------------------------------|
| Calpain 1        | CACCAAGGAAGCCAGCCCCAG         | GTTTTTCATGGCGGCCCAAGCC        |
| Calpain 3        | TCAGAGACTCAGACCTGGACCCCA      | TCCGCAGCCGCACCAACTTC          |
| skNAC            | AGGGTGCCCCGGCTATGACC          | TGGGGAAGTAGGAGGCACATGTTGT     |
| Mef2c            | GAGCTGAGCGTGCTGTGCGA          | GCTCTCGTGCGGCTCGTTGT          |
| Myogenin         | TGGGTGTGCATGTGAGCCCC          | CGCTGGGCTGGGTGTTAGCC          |
| Smyd1            | GCATCTCCCCAACCTGGGCCT         | GGGCCCGGAGCTCAATCCTCAT        |
| Nse2             | CCACCCTGTATCTCAGTGTGGGC       | TGGGACAAAGGACATGGAGGCA        |
| Actin            | AGGGCCAGAGTCAGAGCAGCA         | GGGGCATCATCCCCGGCAAA          |
| Desmin           | TCCTCCTACCGCCGCACCTT          | ACCGAAGCCTGCTCGAGGGA          |
| Foxo1            | CCTGTCGTACGCCGACCTCATCAC      | GTCCATGGACGCAGCTCTTCTCCG      |
| Myf5             | TGAGGGAACAGGTGGAGAAC          | AGCTGGACACGGAGCTTTTA          |
| MyoD             | AGCATAGTGGAGCGCATCTC          | GGTCTGGGTTCCTGTTCTG           |

| <b>Antibody</b>                                                               | <b>Company</b>                       | <b>Cat. no</b>           |
|-------------------------------------------------------------------------------|--------------------------------------|--------------------------|
| $\alpha$ sarcomeric actin                                                     | Abcam (clone 5C5)                    | ab49672                  |
| $\alpha$ -Tubulin                                                             | Cell Signaling (11H10)               | 2125                     |
| Calpain 1                                                                     | Cell Signaling                       | 2556                     |
| Desmin                                                                        | Abcam                                | ab15200                  |
| Emerin                                                                        | Abcam                                | ab                       |
| Flag                                                                          | Sigma-Aldrich                        | F7425                    |
| FoxO1                                                                         | Cell Signaling (C29H4)               | 2880                     |
| GAPDH                                                                         | Abcam                                | ab9484                   |
| HA                                                                            | Santa Cruz (F-7)                     | sc-7392                  |
| Nse2                                                                          | Sigma-Aldrich<br>(Santa Cruz (N-12)) | SAB3500490<br>(sc-87338) |
| MyHC (recognizes $\alpha$ and $\beta$ chains of skeletal and cardiac myosins) | Novus (clone 3-48)                   | NB300-284                |
| PML                                                                           | Santa Cruz (N-19)                    | sc-9862                  |
| skNAC                                                                         | polyclonal rabbit antiserum          | H. Tucker, Austin, Texas |
| Smyd1                                                                         | Santa Cruz (H-21)<br>Abcam           | sc-134016<br>(ab34472)   |
| SUMO-1                                                                        | Cell Signaling<br>Santa Cruz (D11)   | 4930<br>sc-5308          |
